# Supplementary material for: Unleashing floret fertility in wheat through the mutation of a homeobox gene
Source: PubMed Central journal article supplement — Proc Natl Acad Sci U S A. 2019 Feb 21;116(11):5182–7. doi: 10.1073/pnas.1815465116 (PMC6421441; doi:10.1073/pnas.1815465116), 2019-02-21
Supplement: pnas.1815465116.sapp.pdf [file pnas.1815465116.sapp.pdf]

Supplementary Information for

## **Unleashing floret fertility in wheat through the mutation of a homeobox gene**

Shun Sakuma, Guy Golan, Zifeng Guo, Taiichi Ogawa, Akemi Tagiri, Kazuhiko Sugimoto, Nadine Bernhardt, Jonathan Brassac, Martin Mascher, Goetz Hensel, Shizen Ohnishi, Hironobu Jinno, Yoko Yamashita, Idan Ayalon, Zvi Peleg, Thorsten Schnurbusch, Takao Komatsuda

Corresponding authors:

Shun Sakuma; ssakuma@tottori-u.ac.jp

Thorsten Schnurbusch; schnurbusch@ipk-gatersleben.de

Takao Komatsuda; takao@affrc.go.jp

### **This PDF file includes:**

Materials and Methods

Figs. S1 to S9

Tables S1 to S5

References

### **Other supplementary materials for this manuscript include the following:**

Datasets S1 to S4

## Materials and Methods

### QTL mapping

The QTL analysis was based on a population of 94 recombinant inbred substitution lines (RISLs) derived from a cross between durum wheat cv. Langdon (LDN) and the line DIC-2A, which harbors a copy of chromosome 2A inherited from wild emmer wheat accession FA-15-3 (ISR-A) in the genetic background of LDN (1). The phenotyping required an experiment, set out as a randomized complete block design with three replicates, and conducted in an insect-proof screen-house at the experimental farm of the Hebrew University of Jerusalem in Rehovot, Israel (34°47' N, 31°54' E; 54 m above sea level). The number of spikelets and the number of grains per spike were obtained from a sample of three spikes per plant, and these were used to derive the number of grains per spikelet. The linkage analysis and the construction of the genetic map used the evolutionary strategy algorithm included in the MultiPoint package (<http://www.MultiQTL.com>), as previously described (2). QTLs were detected using the general interval mapping function designed for RIL-selfing populations. Bootstrapping (10,000 replicates) was used to estimate standard deviations associated with the locus effect, its chromosomal position, its LOD score and the proportion of the phenotypic variation explained.

### Fine mapping of *GNI-A1*

Three RISLs (RISL #4, #63 and #102), each of which harbored the DIC-2A allele of a marker defining the *GNI-A1* interval, were crossed to LDN and the hybrids allowed to self-pollinate to produce three independent F<sub>2</sub> populations. Recombinants within the target genomic region were detected by genotyping a sample of 1,006 F<sub>2</sub> progeny with the two microsatellite markers *Xgwm558* and *Xcfa2043*. In the following (F<sub>3</sub>) generation, families (eight F<sub>3</sub> individuals per F<sub>2</sub> plant) were genotyped with *Xgwm558*, *Xcfa2043* and *Xhbg494*, and all homozygous recombinants were subsequently genotyped with 12 additional markers (**SI Appendix, Table S4**), which target sequence polymorphisms between the wild and domesticated emmer wheat genome sequences (3). The phenotype of 17 F<sub>4</sub> homozygous recombinants was scored in the field. A split-plot, randomized complete block design experiment with five replicates was carried out in an insect-proof screen-house at Rehovot. Each 1 m × 1 m plot was sown with 20 plants of a single line, and the numbers of spikelets and grains per spike (and the derived number of grains per spikelet) were estimated from a sample of five spikes.

The phenotypic effect of the allelic status at *GNI-A1* was assessed in three field experiments, one conducted in 2015-16 in Rehovot (13 RISLs plus LDN and DIC-2A), one in Rehovot in 2016-17 and one in Ruhama (31°29' N, 34°42' E, 166m above sea level) (18 BC<sub>1</sub>F<sub>4</sub> lines and LDN).

## Transformation of wheat

As the transgene for including RNAi, a 323 bp fragment of *GNI-A1* was amplified (primer details given in ***SI Appendix, Table S4***), inserted into a pENTR D-TOPO vector (Thermo Fisher Scientific, Waltham, MA USA) and transferred via the LR recombination reaction into pANDA-b vector to allow it to be driven by the maize *Ubiquitin1* promoter (4). Transgenic wheat plants were produced by bombarding immature embryos of spring bread wheat variety Bobwhite S-26 (5). Transgene-positive plants were confirmed by PCR using vector-specific primers (***SI Appendix, Table S4***).

## TILLING

The winter bread wheat cv. Kitahonami was used as the TILLING target, with mutations induced by irradiating mature grains with gamma rays (250 Gy). M<sub>1</sub> plants were grown in a greenhouse and all M<sub>2</sub> grains were harvested. DNA was extracted from the M<sub>2</sub> plants and used as the TILLING template. The primers used to amplify the key fragment of *GNI-A1* are given in ***SI Appendix, Table S4***. The phenotype of selected M<sub>3</sub> families was evaluated in the National Institute of Agrobiological Sciences (NIAS) experimental field in Tsukuba, Japan (36°01' N, 140°06' E).

## Yield trials

Mutants of cv. Kitahonami in the M<sub>4</sub> generation were used in yield trials. M<sub>4</sub> seeds were collected from ~10 M<sub>3</sub> plants selected as either homozygous for the 105Y or for the 105N allele. The plants were grown at both the Kitami Agricultural Experiment Station (43°44'N, 143°43'W, Kitami, Hokkaido, Japan) and the Central Agricultural Experiment Station (43°3'N, 141°45'W, Naganuma, Hokkaido, Japan). At the former location, each entry was represented by four 5.4 m<sup>2</sup> plots (sowing density 200 grains/m<sup>2</sup>), and at the latter by three 4.8 m<sup>2</sup> plots (same sowing density). The fertilizer regime at Kitami was 156 kg/ha N, 175 kg/ha P, 70 kg/ha K, and at Naganuma (respectively 140, 125 and 50 kg/ha).

## RNA extraction and qRT-PCR

Immature spikes were developmentally staged by observation under a stereoscopic microscope (6). Total RNA was extracted using TRIzol (Invitrogen) and quantified using NanoDrop 1000 (Thermo Fisher Scientific). The resulting RNA was treated with RNase-free DNase (Takara Bio) to remove contaminating genomic DNA, and the cDNA first strand synthesized from a 25 ng aliquot of RNA using SuperScript III (Invitrogen). Transcript abundances were obtained by qRT-PCR using a StepOne Real-Time PCR System (Applied Biosystems) and a THUNDERBIRD SYBR qPCR Mix Kit (Toyobo) according to the manufacturers' protocols. The relevant primer

sequences are detailed in *SI Appendix, Table S4*. Each of the amplified gene fragments was cloned into pBluescript II KS (+) vector (Stratagene) and the resulting plasmids used to generate standard curves for the purpose of absolute quantification. Each qRT-PCR comprised at least three technical replicates, and each sample was represented by three biological replicates. The *Actin* gene was used as the reference sequence.

### ***In situ* mRNA hybridization**

A 300 bp 3'-UTR segment of *GNI1* was amplified from cDNA prepared from immature wheat spikes using primers detailed in *SI Appendix, Table S4*. The amplicon was inserted into the pBluescript II KS (+) vector. Clones harboring the insert orientated oppositely were linearized by digestion with *EcoRI*, and treated with T3 RNA polymerase in order to generate both a sense and an antisense probe. The method used for *in situ* hybridization have been described elsewhere (7).

### **RNA-seq**

RNA was extracted from immature inflorescences harvested at the white and green anther stages from plants of the cv. Kitahonami M<sub>4</sub> families using the TRIzol (Invitrogen) and treated with DNase I (Roche). The quality of the RNA was evaluated using an Agilent 2100 Bioanalyzer (Agilent Technologies). RNA-seq libraries were prepared using the NEBNext Ultra™ RNA Library Prep Kit for Illumina (New England Biolabs, Inc., Ipswich, MA, USA) and sequenced using a HiSeq 4000 device (Illumina, Inc., San Diego, CA, USA). Estimates of transcript abundance were based on the number of transcripts per million reads (TPM). TPM was quantified by pseudo-alignment against the representative transcripts of high-confidence and low-confidence genes annotated on the IWGSC RefSeq V1 pseudomolecules (8) using Kallisto version 0.43.1 (9). Abundance estimates were imported into the R statistical environment (10). The identification of differential transcription was carried out using Limma-voom (11, 12). Differentially expressed genes (DEGs) were required to have log<sub>2</sub> fold change ≥ 2 or ≤ -2 between contrasted conditions and an adjusted *P*-value ≤ 0.05 after Benjamini-Hochberg correction. Enrichment of gene ontology (GO) terms was analyzed with topGO (13) using the GO term assignment of IWGSC, 2018. The transcript data of *FTI* obtained from Wheat Expression Browser (<http://www.wheat-expression.com>; (14, 15)

### **Haplotype analysis**

The panel of 72 tetraploid wheat accessions used for resequencing a 1,053 bp fragment of *GNI-A1* included 35 wild emmer, 14 domesticated emmer and 23 durum (*SI Appendix, Table S2*). The relevant primers are detailed in *SI Appendix, Table S4*. Of

the 72 entries, 30 were phenotyped with respect to the number of grains set per spikelet. Sequence alignments were performed using ClustalW as implemented in MEGA v7.0 software (16). A median-joining network (17) was constructed using DNA Alignment v1.3.3.2 and Network v5.0.0.1 software (Fluxus Technology) with default parameter settings (epsilon = 0; frequency . 1 criterion = inactive; The ratio of transversion:transition = 1:1; Criterion = Connection cost; External rooting = inactive; MJ square option = inactive). A panel of 210 European winter bread wheat cultivars (**SI Appendix, Table S3**) was similarly used for resequencing *GNI-A1*; their phenotype was recovered from archived data (18) (**Dataset S3**).

### Phylogenetic analysis

A phylogenetic analysis was based on 139 entries, representing 35 Triticeae species (14 genera), with *Brachypodium* and *Bromus* used as the outgroup taxa (**SI Appendix, Table S5**). Sequence capture was performed as described elsewhere (19). For each taxon, a set of overlapping probes was designed to cover each sequence at least four times. The probe sequences are listed in **Dataset S4**. Sequences were assembled using Geneious v10.0.9 (20). For the diploid and autotetraploid taxa, reads were mapped simultaneously to barley *Vrs1* (AB478778) and *HvHox2* (AB490233) using the “Medium-Low Sensitivity” parameter. Only reads for which both sequences of a pair mapped were kept. For heterozygous diploid and allotetraploid entries, the haplotype phasing consisted of mapping, followed by *de novo* assembly, to obtain two alleles or homoeologs per locus, as previously described (21). Diploid heterozygous individuals were phased individual-wise. As a control, the two alleles recovered from each individual were used as references for mapping the reads from that individual. For allotetraploid entries, phasing was performed on the individual of a species showing the highest sequence coverage. The retrieved homoeologs were subsequently used as references (KU-8939, PI 428093). To control for potential chimeras the assemblies were manually inspected and their contigs aligned using Mafft v7.308 (22). For hexaploid wheat, the cv. Chinese Spring alleles of *GNI1* and *TaHox2* were used as references for read mapping. All assemblies were inspected for misalignments and coverage inconsistencies. Consensus sequences were called using the ‘Highest Quality’ threshold, and multiple sequence alignment were performed using MAFFT, as implemented in GENEIOUS v10.2.3. The alignment was checked manually and trimmed to the coding sequences. The best-fit model of nucleotide substitution was selected using jModelTest2 (23). The Bayesian information criterion (24) selected K80 + G out of 24 tested models. Bayesian phylogenetic inferences were calculated using MrBayes v3.2.6 (25) mounted on Cyberinfrastructure for Phylogenetic Research (Cipres) Science Gateway v3.3 (26, 27). Two parallel Metropolis-coupled Monte Carlo Markov chain analyses with four chains were run for six million generations, sampling trees every 500 generations. Convergence of the runs was assessed applying a standard deviation of split frequencies threshold of 0.01. The continuous parameter values sampled from the chains were checked for mixing using Tracer v1.6 (<http://beast.bio.ed.ac.uk/Tracer>). A consensus tree was computed in MrBayes following burn-in of the initial 25% of trees. The consensus tree was visualized in Figtree v1.4.2

(<http://tree.bio.ed.ac.uk/software/figtree>), using the node representing the most recent common ancestor of *Brachypodium* and the Triticeae as the root.

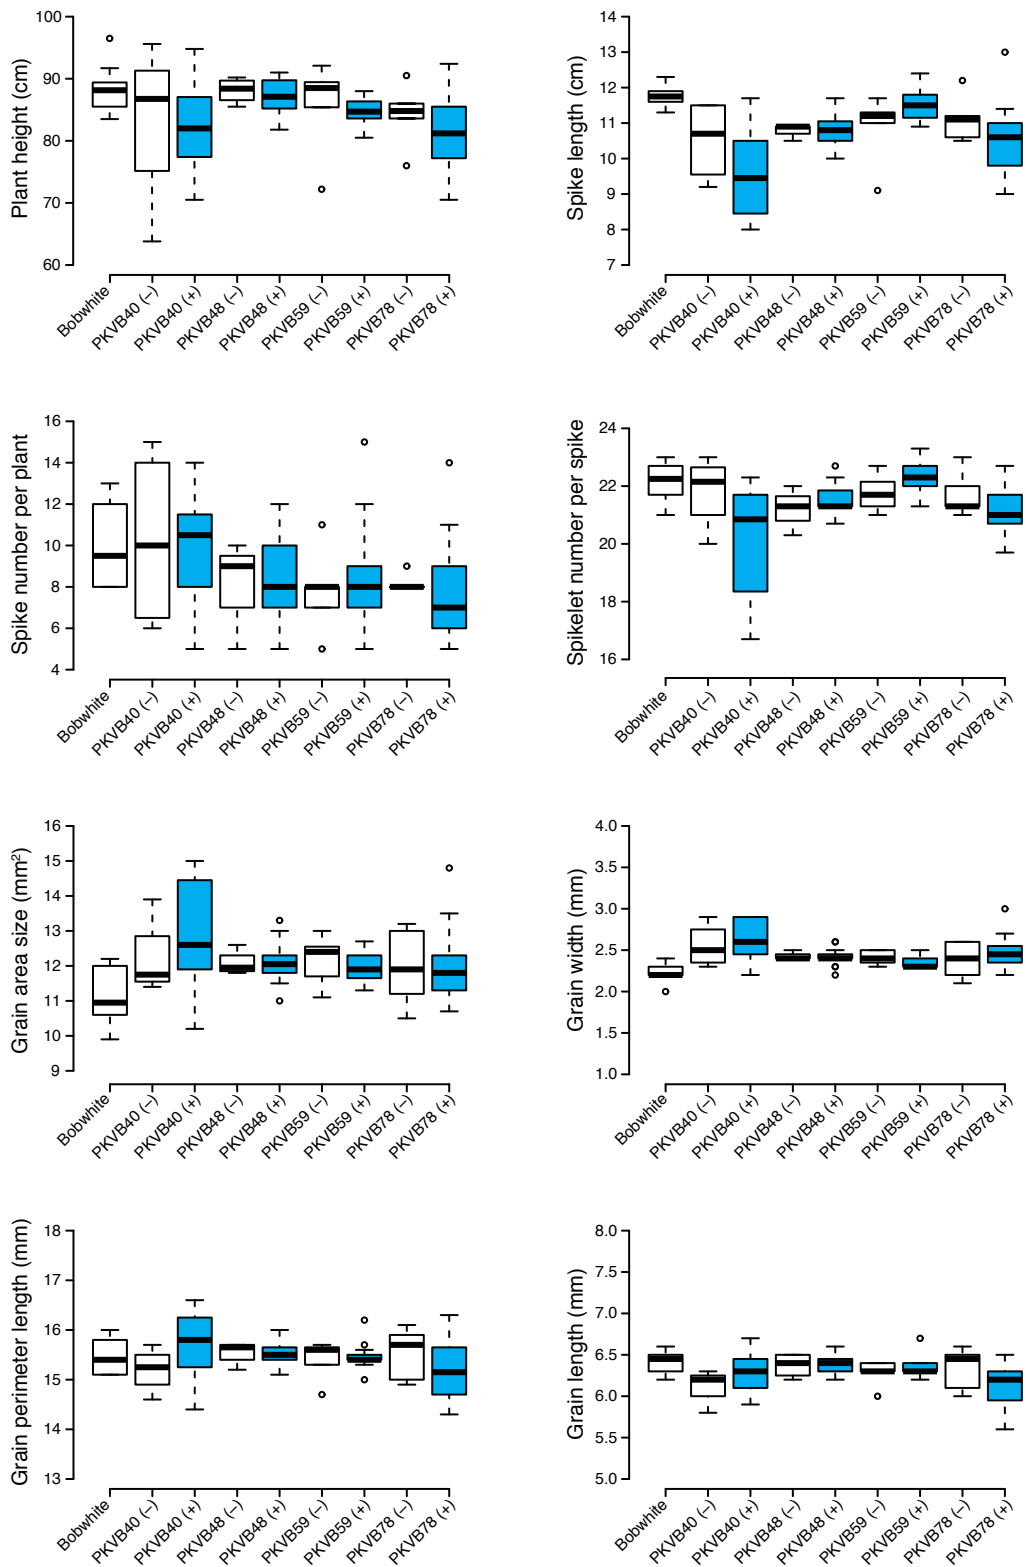

**Fig. S1.** The phenotype of cv. Bobwhite harboring a *GNI-AI* RNAi construct. White boxes indicate construct-negative plants and blue ones construct-positive plants.

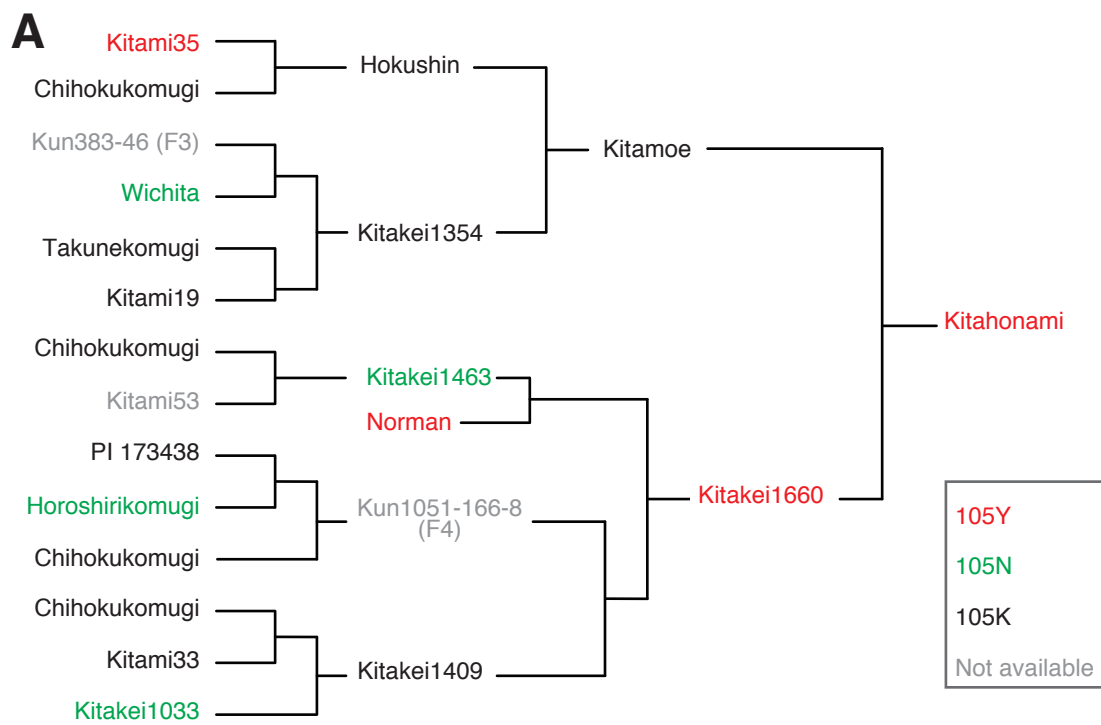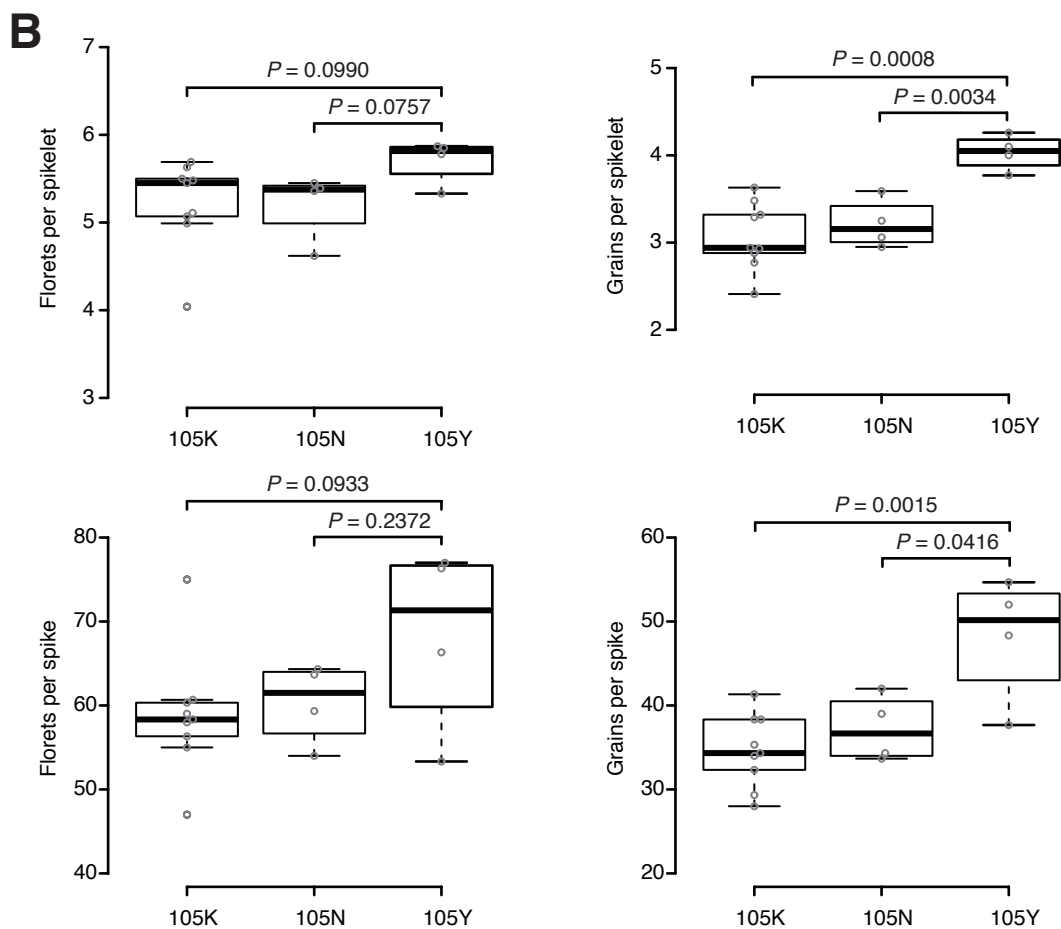

**Fig. S2.** The pedigree of cv. Kitahonami and their yield performance. (A) Genealogy of cv. Kitahonami, (B) variation in the number of florets per spikelet and the number of grains per spikelet in the progenitors of the cultivar.



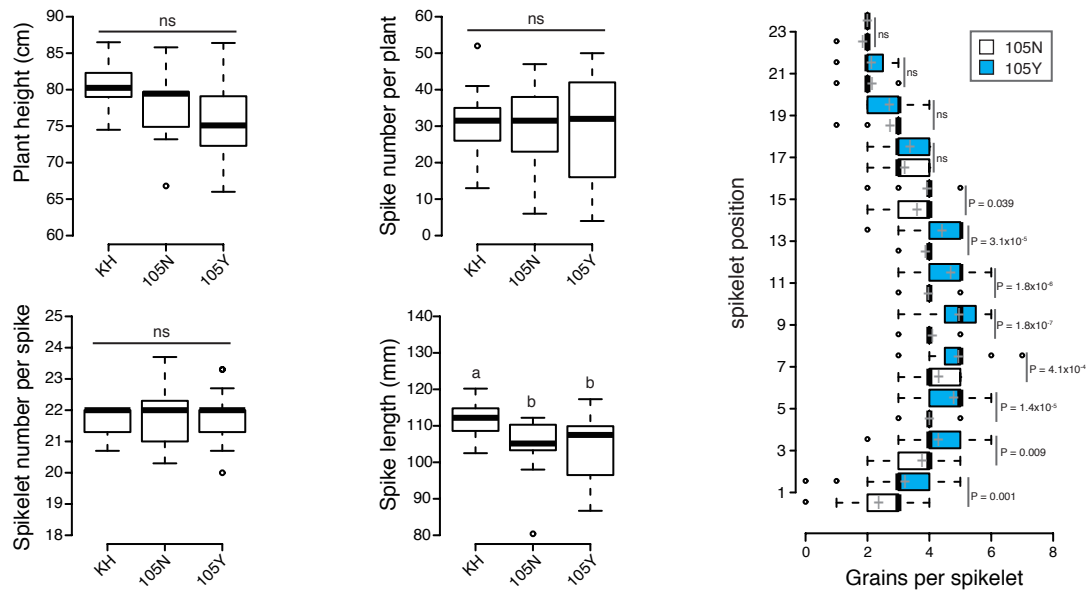

**Fig. S3.** The phenotype of *GNI-A1* TILLING mutants. Comparisons were made between mutation homozygotes in the  $M_3$  generation. 105N: the functional *GNI-A1* allele, 105Y: the reduced-function allele carried by cv. Kitahonami (KH). Box edges represent the 25% quantile and 75% quantile with the median values shown by bold lines. Whiskers indicate 1.5 times the interquartile range, and remaining data are indicated by circles.+: mean values. Differences between haplotype means analyzed using Tukey's Honest Significant Difference test or the Student's *t*-test ( $P \leq 0.05$ ). ns; non-significant.

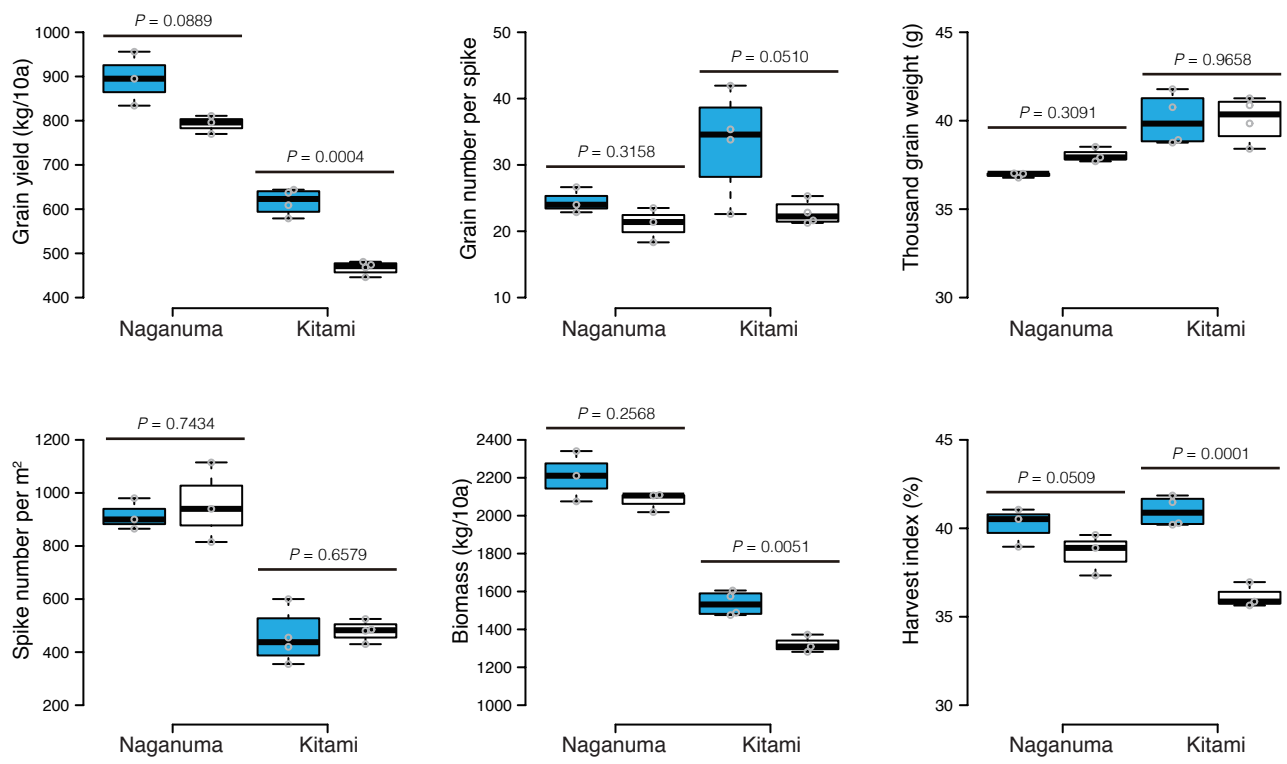

**Fig. S4.** Grain yield of the *GNI-A1* TILLING mutants under field conditions. The performance of  $M_4$  generation lines was compared at two locations. The blue box indicates the 105Y allele and white box the 105N allele. The significance of differences between trait means was determined by Student's *t*-test ( $n=4$  in Kitami,  $n=3$  in Naganuma).

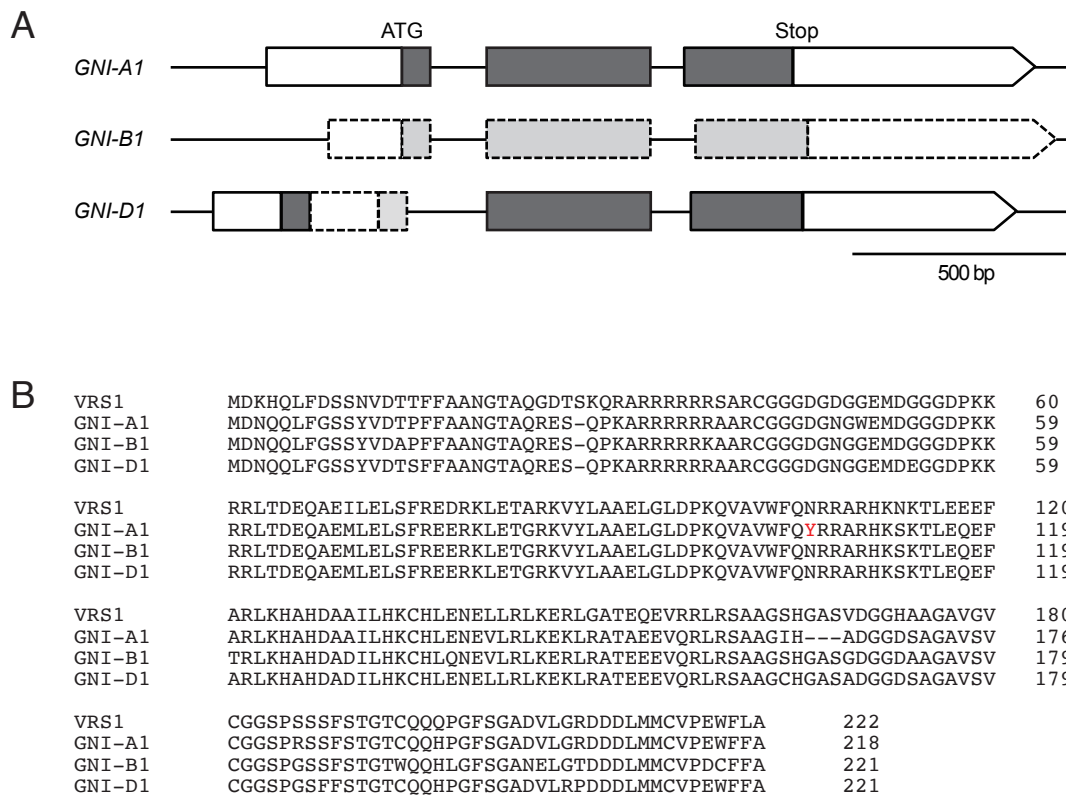

**Fig. S5.** *GNI* gene structure. (A) The structure of the three hexaploid wheat *GNI* homoeologs. Exons shown as boxes, introns as lines. White boxes indicate UTRs and grey boxes coding regions. The transparent boxes in *GNI-B1* and *GNI-D1* indicate non-transcribed sequences. (B) The amino acid sequences of VRS1 and GNI1. The position of Tyr 105 (Y) in GNI-A1 is indicated.

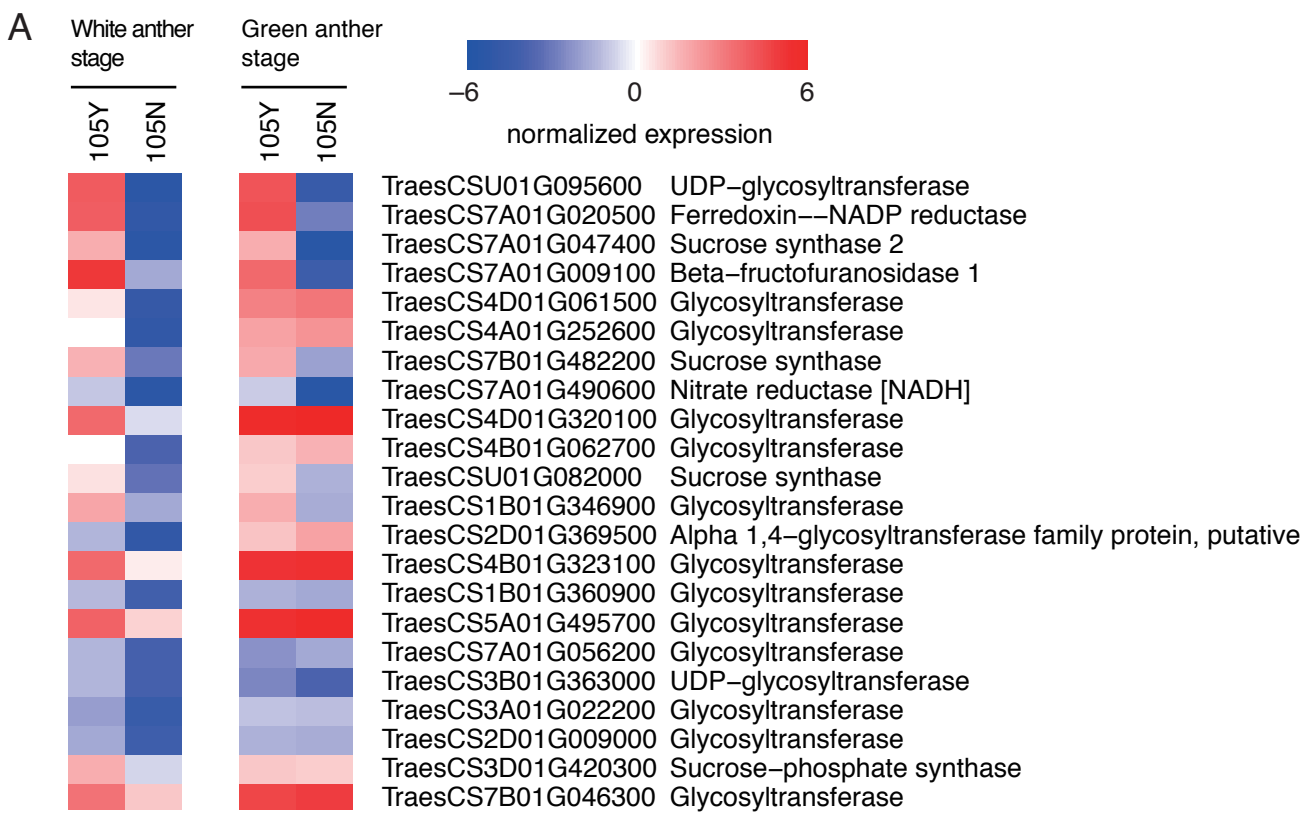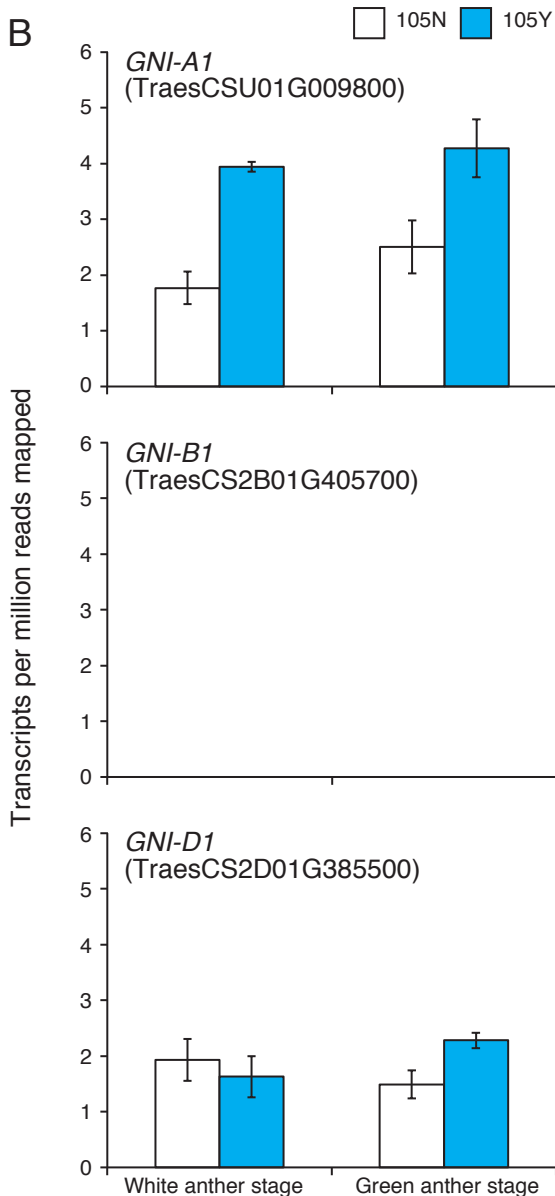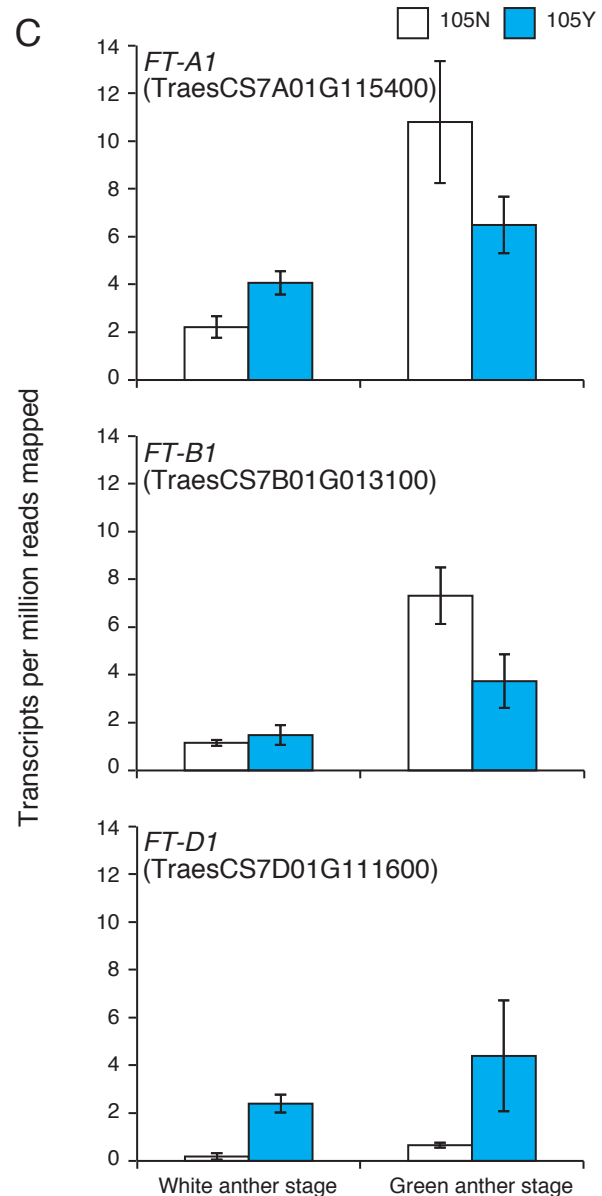

**Fig. S6.** Comparison of transcript level between 105Y and 105N alleles. (A) Heat map illustrating that carriers of the *GNI-A1* 105Y allele experience up-regulation of many genes implicated in nitrogen and sucrose metabolism. (B and C) The abundance of *GNI* (B) and *FTI* (C) transcripts in carriers of the *GNI-A1* 105N and 105Y alleles, derived from RNA-seq. Values shown as mean±SD ( $n=4$ ).

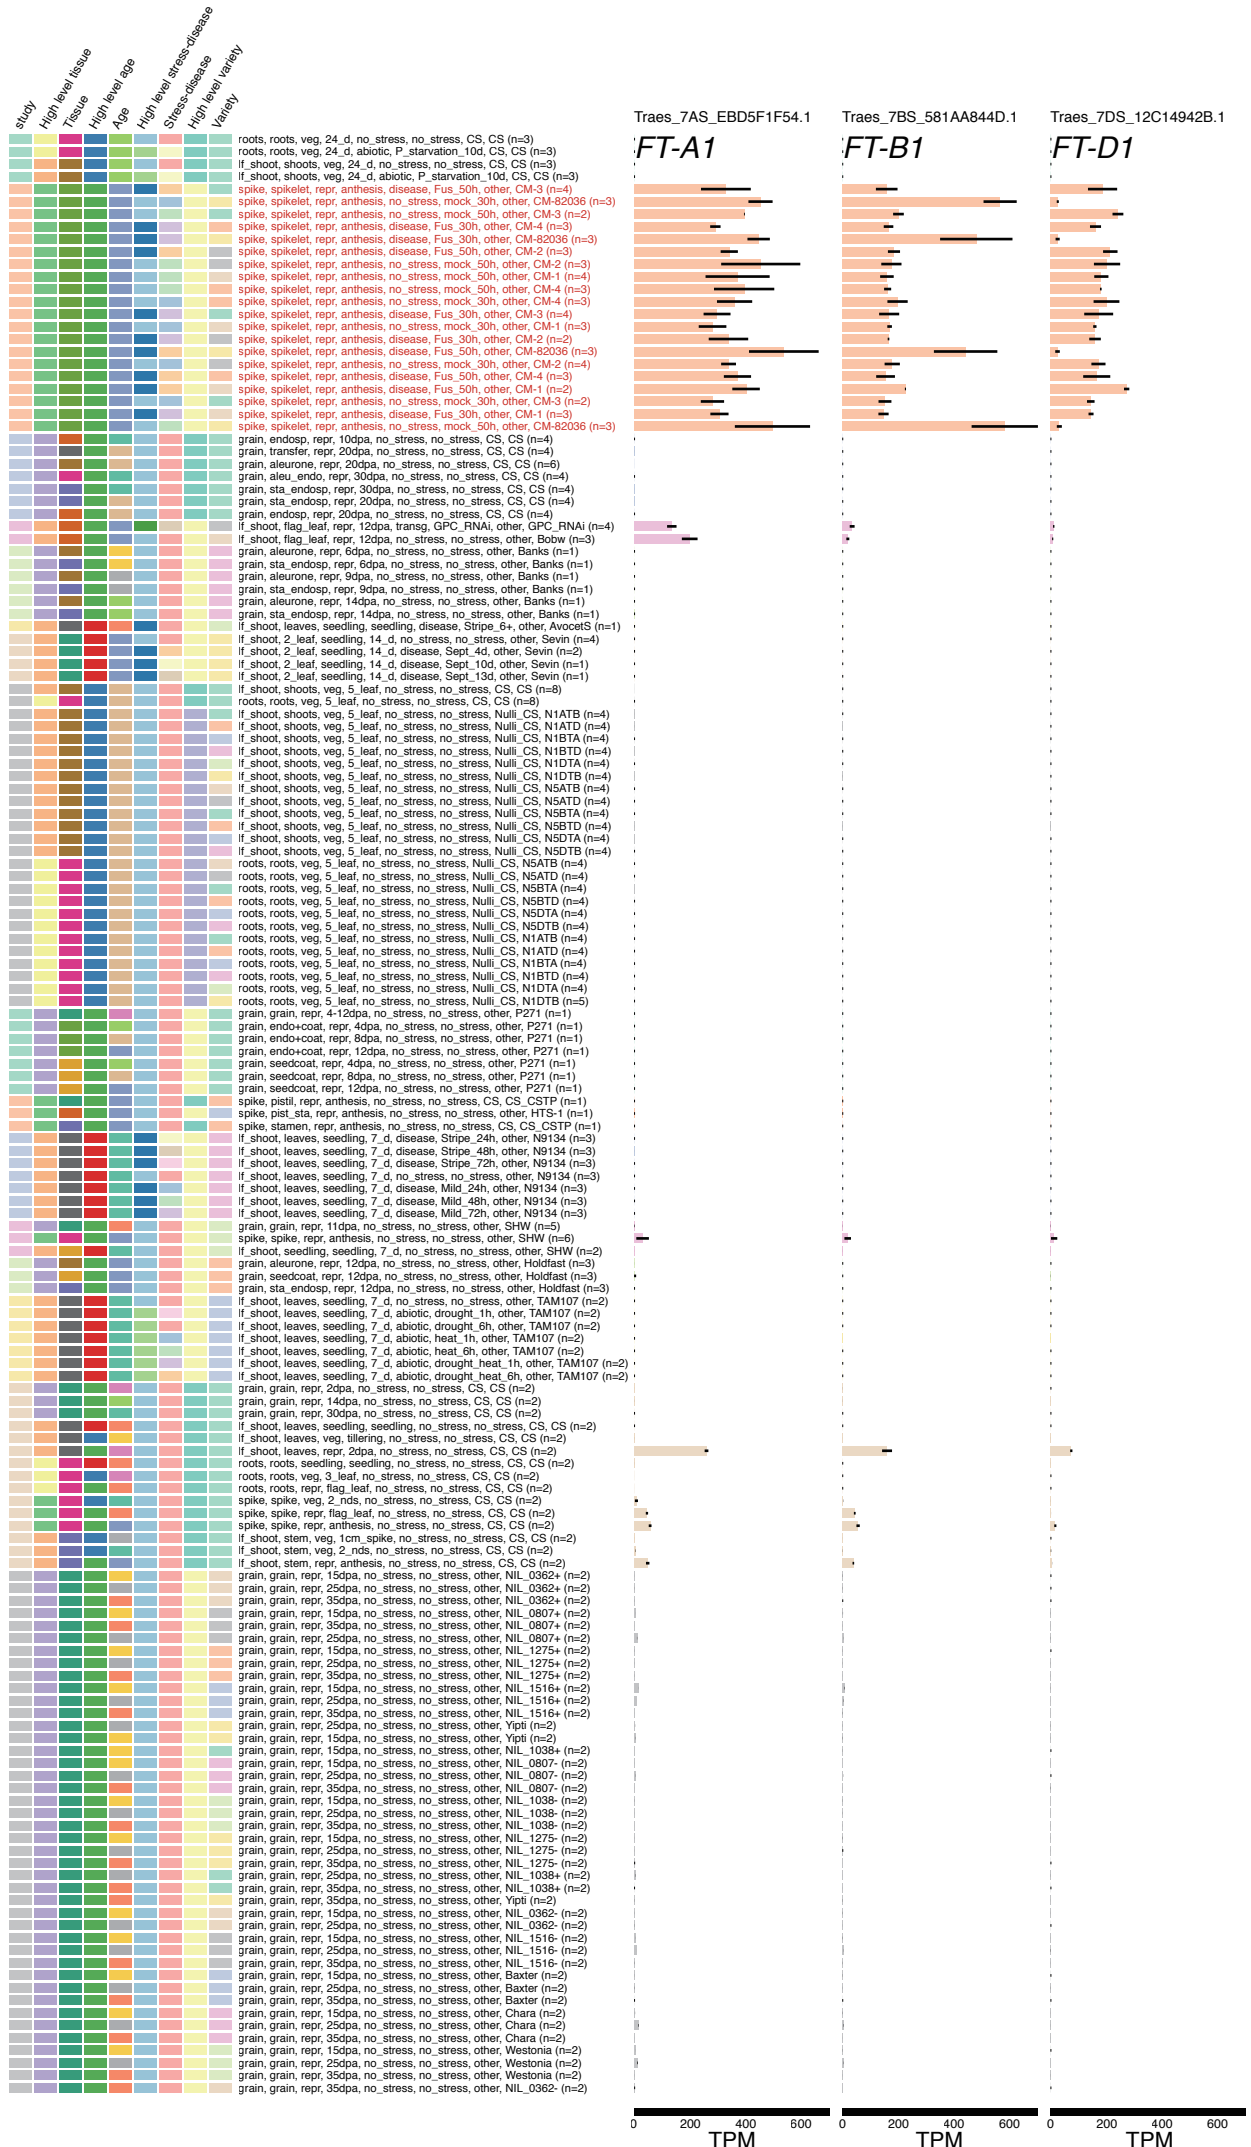

**Fig. S7. FT1 transcription in bread wheat.** The abundance of transcripts is shown in the form transcripts per million reads (TPM). Data obtained from Wheat Expression Browser (<http://www.wheat-expression.com>).

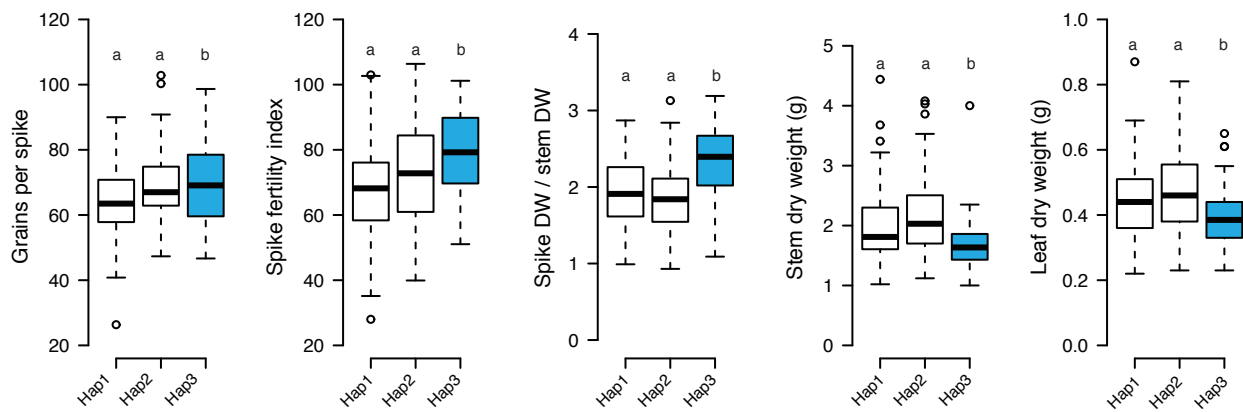

**Fig. S8.** The agronomic phenotype of the members of the winter bread wheat panel. The spike fertility index represents the ratio between the grain number per spike and the weight of the spike chaff. DW: dry weight. Letters are used to indicate where means differed from one another significantly ( $P \leq 0.05$ ), as determined by Tukey's Honest Significant Difference test.

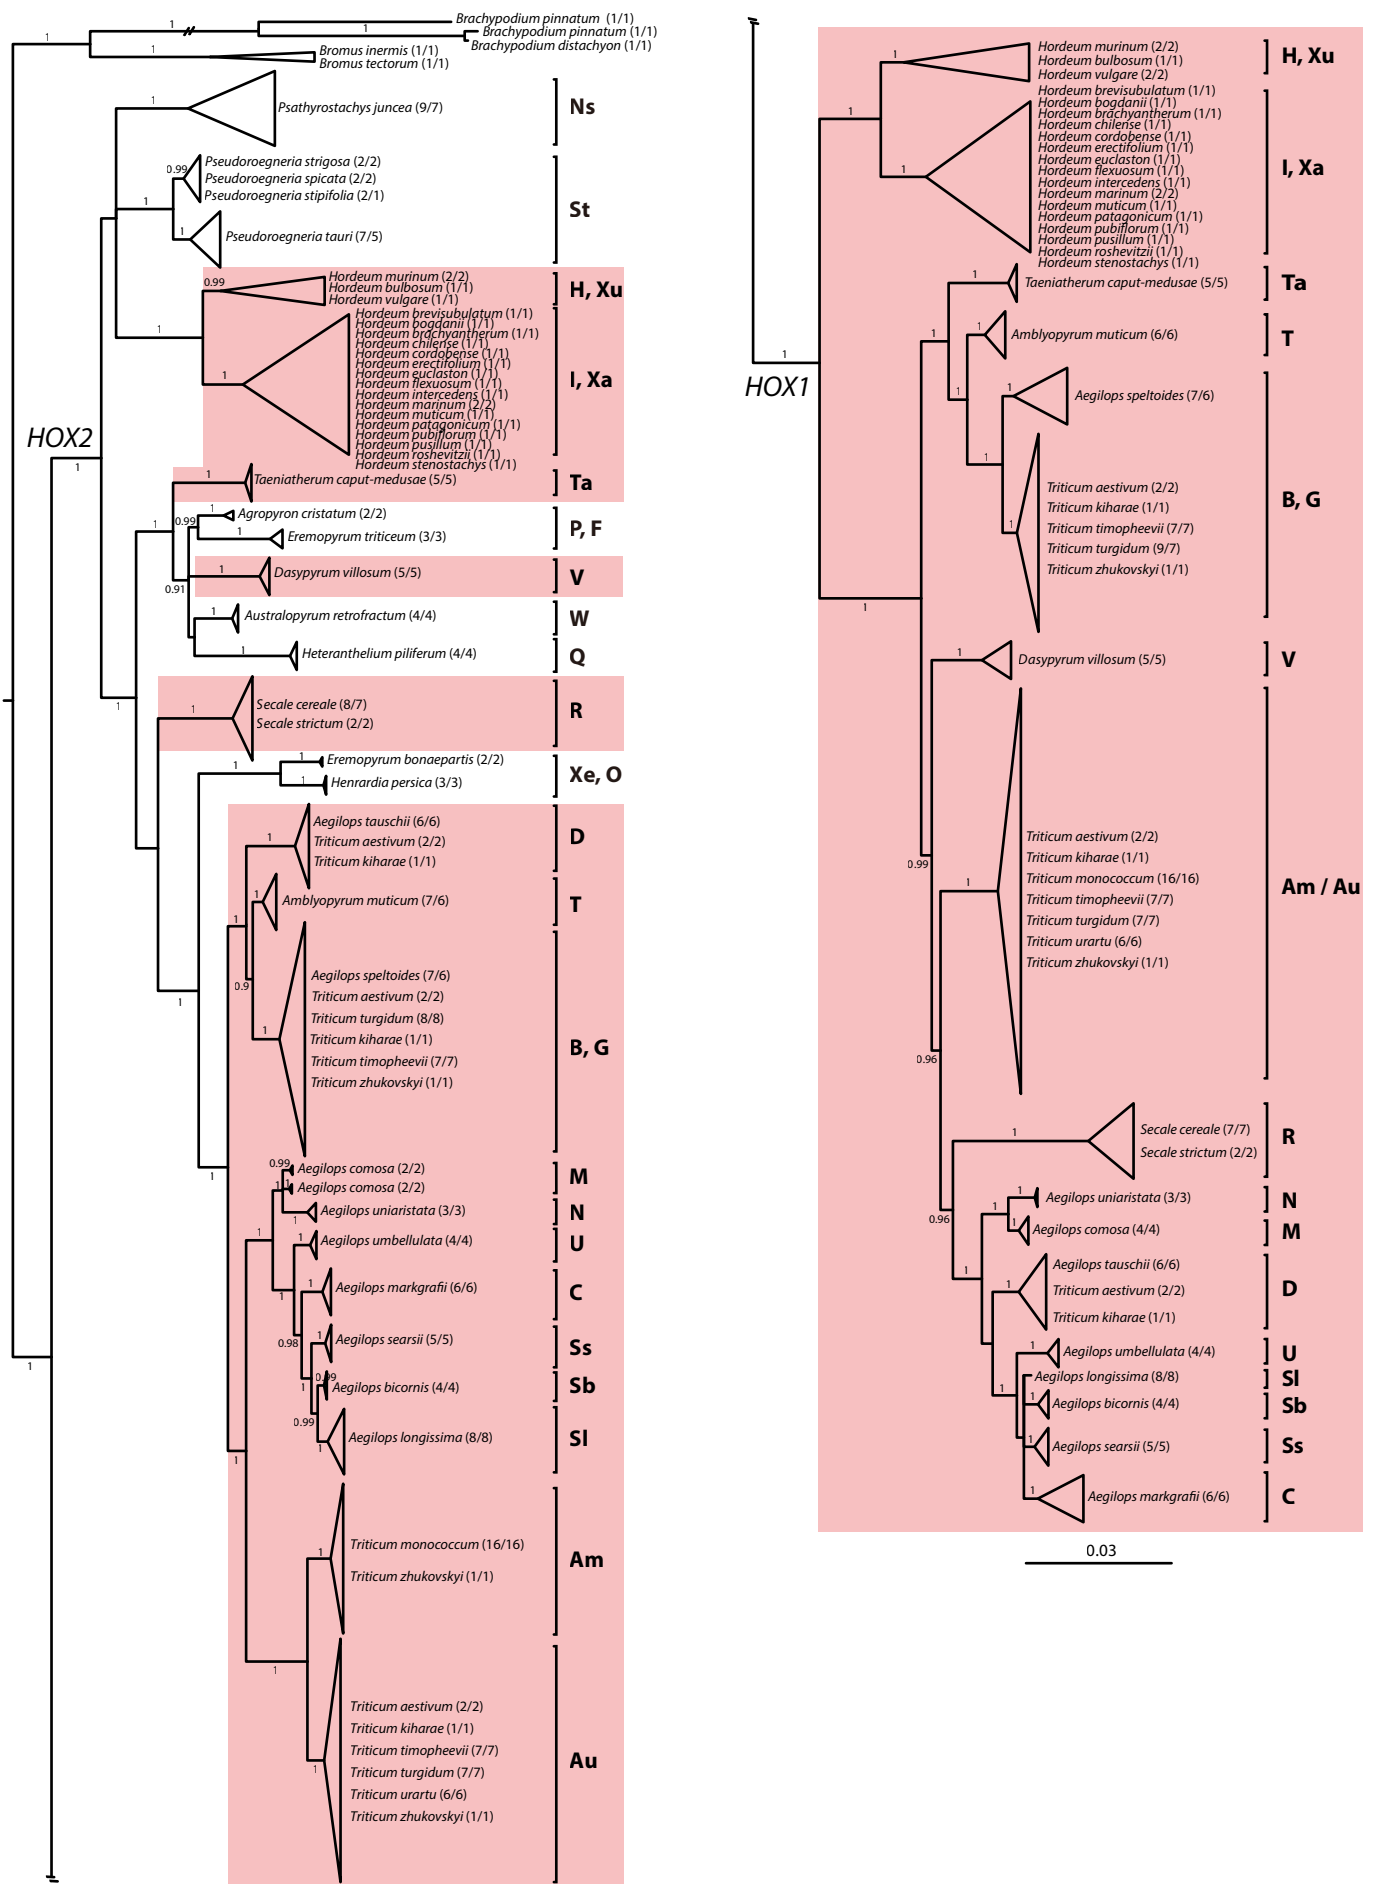

**Fig. S9.** The phylogeny of *HOX1* and *HOX2*. The multiple sequence alignment consisted of 361 sequences (1,496 nt) obtained from 51 Triticeae species belonging to 14 genera. *Brachypodium* and *Bromus* were used as the outgroup taxa. Support values appearing next to each node are given as a posterior probability when above 0.9. Clades were collapsed into triangles to reflect the main groupings. The area of the triangles reflects the genetic variation contained within the clade. The numbers appearing after the species names indicates the number of alleles present, followed by the number of accessions re-sequenced. Genomic groups are indicated to the right. Red boxes highlight taxa including homologs of both *HOX2* and *HOX1*. The *Ae. longissima* copy of *HOX1* did not cluster into a single clade, instead formed a polytomy with the ancestor of *Ae. bicornis*, *Ae. markgrafii*, and *Ae. searsii*.

**Table S1.** Genes lying within the genetic interval harboring *GNI-A1*.

| Gene ID (Zabitan)     | Start (bp)       | End (bp)         | Annotation                                             |
|-----------------------|------------------|------------------|--------------------------------------------------------|
| TRIDC2AG055740        | 626026540        | 626032109        | autophagy related protein                              |
| TRIDC2AG055760        | 626312993        | 626323686        | kinesin like protein                                   |
| TRIDC2AG055770        | 626329188        | 626334644        | BRCT domain-containing protein                         |
| TRIDC2AG055780        | 626566752        | 626567426        | Lactoylglutathione lyase / glyoxalase I family protein |
| TRIDC2AG055790        | 626573695        | 626849477        | NAD(P)H-quinone oxidoreductase subunit M               |
| <b>TRIDC2AG055810</b> | <b>626823738</b> | <b>626838029</b> | <b>Homeobox-leucine zipper protein family</b>          |
| TRIDC2AG055830        | 626843724        | 626859831        | unknown function                                       |
| TRIDC2AG055850        | 627403332        | 627414185        | uncharacterized                                        |
| TRIDC2AG055870        | 627918309        | 627928023        | undescribed protein                                    |
| TRIDC2AG055880        | 627933028        | 627936558        | unknown function                                       |
| TRIDC2AG055890        | 627943119        | 627944792        | Cytochrome P450 superfamily protein                    |
| TRIDC2AG055900        | 628484338        | 628487746        | Leucine-rich repeat (LRR) family protein               |
| TRIDC2AG055910        | 628703514        | 628705838        | GATA transcription factor                              |
| TRIDC2AG055920        | 628767384        | 628771868        | SH3 domain-containing protein                          |
| TRIDC2AG055960        | 628878078        | 628879391        | B-box zinc finger family protein                       |
| TRIDC2AG055980        | 629059513        | 629062826        | undescribed protein                                    |
| TRIDC2AG055990        | 629067624        | 629069433        | COBRA-like protein 7                                   |
| TRIDC2AG056000        | 630047055        | 630059045        | Formin Homology 14                                     |
| TRIDC2AG056020        | 630069315        | 630073680        | Aldehyde de hydrogenase                                |
| TRIDC2AG056050        | 630341620        | 630346963        | multiprotein bridging factor 1A                        |
| TRIDC2AG056060        | 630384017        | 630385673        | Protein kinase superfamily protein                     |
| TRIDC2AG056070        | 630835927        | 630839606        | Trihelix transcription factor GT-2                     |
| TRIDC2AG056100        | 631135440        | 631141632        | sphingosine kinase 1                                   |
| TRIDC2AG056120        | 631145110        | 631146719        | Homeobox leucine zipper                                |
| TRIDC2AG056130        | 631215223        | 631217410        | Ubiquitin-specific protease family C19-related protein |
| TRIDC2AG056140        | 631369996        | 631371886        | Protein of unknown function, DUF584                    |



**Table S2.** *GNI-A1* haplotype variation in tetraploid wheat.

| Accession  | Species                                    | <i>GNI-A1</i> |
|------------|--------------------------------------------|---------------|
| PI 428018  | <i>T. turgidum</i> ssp. <i>dicoccoides</i> | Hap01         |
| 28-6       | <i>T. turgidum</i> ssp. <i>dicoccoides</i> | Hap01         |
| PI 554583  | <i>T. turgidum</i> ssp. <i>dicoccoides</i> | Hap01         |
| PI 481521  | <i>T. turgidum</i> ssp. <i>dicoccoides</i> | Hap01         |
| PI 538626  | <i>T. turgidum</i> ssp. <i>dicoccoides</i> | Hap01         |
| PI 428014  | <i>T. turgidum</i> ssp. <i>dicoccoides</i> | Hap01         |
| 12-3       | <i>T. turgidum</i> ssp. <i>dicoccoides</i> | Hap01         |
| 18-60      | <i>T. turgidum</i> ssp. <i>dicoccoides</i> | Hap01         |
| mm5/4      | <i>T. turgidum</i> ssp. <i>dicoccoides</i> | Hap01         |
| 24-39      | <i>T. turgidum</i> ssp. <i>dicoccoides</i> | Hap01         |
| 10-209     | <i>T. turgidum</i> ssp. <i>dicoccoides</i> | Hap01         |
| PI 428092  | <i>T. turgidum</i> ssp. <i>dicoccoides</i> | Hap01         |
| Citr 17676 | <i>T. turgidum</i> ssp. <i>dicoccoides</i> | Hap01         |
| Rei-1      | <i>T. turgidum</i> ssp. <i>dicoccoides</i> | Hap02         |
| PI 428054  | <i>T. turgidum</i> ssp. <i>dicoccoides</i> | Hap02         |
| PI 428077  | <i>T. turgidum</i> ssp. <i>dicoccoides</i> | Hap02         |
| 35-9       | <i>T. turgidum</i> ssp. <i>dicoccoides</i> | Hap02         |
| HR1-24     | <i>T. turgidum</i> ssp. <i>dicoccoides</i> | Hap02         |
| kh2/3      | <i>T. turgidum</i> ssp. <i>dicoccoides</i> | Hap03         |
| IG 46323   | <i>T. turgidum</i> ssp. <i>dicoccoides</i> | Hap03         |
| IG 45494   | <i>T. turgidum</i> ssp. <i>dicoccoides</i> | Hap03         |
| PI 538700  | <i>T. turgidum</i> ssp. <i>dicoccoides</i> | Hap03         |
| PI 503316  | <i>T. turgidum</i> ssp. <i>dicoccoides</i> | Hap03         |
| IG 116184  | <i>T. turgidum</i> ssp. <i>dicoccoides</i> | Hap03         |
| IG 46476   | <i>T. turgidum</i> ssp. <i>dicoccoides</i> | Hap03         |
| 36-24      | <i>T. turgidum</i> ssp. <i>dicoccoides</i> | Hap03         |
| Citr 17675 | <i>T. turgidum</i> ssp. <i>dicoccoides</i> | Hap03         |
| TTD140     | <i>T. turgidum</i> ssp. <i>dicoccoides</i> | Hap04         |
| Am-1       | <i>T. turgidum</i> ssp. <i>dicoccoides</i> | Hap04         |
| PI 428069  | <i>T. turgidum</i> ssp. <i>dicoccoides</i> | Hap05         |
| 13-B-53    | <i>T. turgidum</i> ssp. <i>dicoccoides</i> | Hap06         |
| Alm-1      | <i>T. turgidum</i> ssp. <i>dicoccoides</i> | Hap06         |
| ISR-A      | <i>T. turgidum</i> ssp. <i>dicoccoides</i> | Hap06         |
| Zabitan    | <i>T. turgidum</i> ssp. <i>dicoccoides</i> | Hap06         |
| 8941       | <i>T. turgidum</i> ssp. <i>dicoccoides</i> | Hap07         |
| TTC 01 79  | <i>T. turgidum</i> ssp. <i>dicoccum</i>    | Hap07         |
| G-929      | <i>T. turgidum</i> ssp. <i>dicoccum</i>    | Hap07         |
| TTC 09 88  | <i>T. turgidum</i> ssp. <i>dicoccum</i>    | Hap07         |
| PI 298586  | <i>T. turgidum</i> ssp. <i>dicoccum</i>    | Hap07         |
| PI 197496  | <i>T. turgidum</i> ssp. <i>dicoccum</i>    | Hap07         |
| TTC 02 80  | <i>T. turgidum</i> ssp. <i>dicoccum</i>    | Hap07         |
| TTC 03 81  | <i>T. turgidum</i> ssp. <i>dicoccum</i>    | Hap07         |
| PI94637    | <i>T. turgidum</i> ssp. <i>dicoccum</i>    | Hap07         |
| PI94649    | <i>T. turgidum</i> ssp. <i>dicoccum</i>    | Hap07         |
| TTC 10 89  | <i>T. turgidum</i> ssp. <i>dicoccum</i>    | Hap08         |
| PI 626468  | <i>T. turgidum</i> ssp. <i>dicoccum</i>    | Hap08         |
| PI 25415   | <i>T. turgidum</i> ssp. <i>dicoccum</i>    | Hap08         |
| PI 225332  | <i>T. turgidum</i> ssp. <i>dicoccum</i>    | Hap08         |
| PI 94633   | <i>T. turgidum</i> ssp. <i>dicoccum</i>    | Hap08         |
| Gaza       | <i>T. turgidum</i> ssp. <i>durum</i>       | Hap08         |
| LDN        | <i>T. turgidum</i> ssp. <i>durum</i>       | Hap09         |
| kofa       | <i>T. turgidum</i> ssp. <i>durum</i>       | Hap09         |

|            |                                      |       |
|------------|--------------------------------------|-------|
| Abu fashi  | <i>T. turgidum</i> ssp. <i>durum</i> | Hap09 |
| c-61       | <i>T. turgidum</i> ssp. <i>durum</i> | Hap09 |
| Svevo      | <i>T. turgidum</i> ssp. <i>durum</i> | Hap09 |
| Kyperounda | <i>T. turgidum</i> ssp. <i>durum</i> | Hap09 |
| MG26427    | <i>T. turgidum</i> ssp. <i>durum</i> | Hap09 |
| Juljulith  | <i>T. turgidum</i> ssp. <i>durum</i> | Hap09 |
| Simhon     | <i>T. turgidum</i> ssp. <i>durum</i> | Hap09 |
| Dganit     | <i>T. turgidum</i> ssp. <i>durum</i> | Hap09 |
| Inbar      | <i>T. turgidum</i> ssp. <i>durum</i> | Hap09 |
| Noa        | <i>T. turgidum</i> ssp. <i>durum</i> | Hap09 |
| Durum 33   | <i>T. turgidum</i> ssp. <i>durum</i> | Hap09 |
| Durum 39   | <i>T. turgidum</i> ssp. <i>durum</i> | Hap09 |
| Eliav      | <i>T. turgidum</i> ssp. <i>durum</i> | Hap09 |
| Durum 74   | <i>T. turgidum</i> ssp. <i>durum</i> | Hap09 |
| Givati     | <i>T. turgidum</i> ssp. <i>durum</i> | Hap09 |
| Uzan       | <i>T. turgidum</i> ssp. <i>durum</i> | Hap09 |
| Abu fashi  | <i>T. turgidum</i> ssp. <i>durum</i> | Hap09 |
| m2787      | <i>T. turgidum</i> ssp. <i>durum</i> | Hap09 |
| JM-3989    | <i>T. turgidum</i> ssp. <i>durum</i> | Hap09 |
| m2034      | <i>T. turgidum</i> ssp. <i>durum</i> | Hap09 |

---

**Table S3.** The membership of the winter bread wheat panel.

| ID     | Cultivar name | Country        | Release year | GNI-A1 |
|--------|---------------|----------------|--------------|--------|
| GW0061 | Monopol       | Germany        | 1975         | Hap1   |
| GW0215 | Recital       | France         | 1986         | Hap3   |
| GW0004 | Alidos        | Germany        | 1987         | Hap1   |
| GW0096 | Zentos        | Germany        | 1989         | Hap1   |
| GW0001 | Actros        | Germany        | 2005         | Hap2   |
| GW0037 | Greif         | Germany        | 1989         | Hap3   |
| GW0045 | Kontrast      | Germany        | 1990         | Hap1   |
| GW0003 | Akteur        | Germany        | 2003         | Hap2   |
| GW0007 | Asketis       | Germany        | 1998         | Hap2   |
| GW0025 | Contra        | Germany        | 1990         | Hap3   |
| GW0234 | Hereward      | United Kingdom | 1991         | Hap1   |
| GW0008 | Astron        | Germany        | 1989         | Hap2   |
| GW0085 | Tambor        | Germany        | 1993         | Hap1   |
| GW0074 | Ritmo         | Germany        | 1993         | Hap3   |
| GW0086 | Tarso         | Germany        | 1994         | Hap1   |
| GW0009 | Atlantis      | Germany        | 1992         | Hap2   |
| GW0010 | Batis         | Germany        | 1994         | Hap2   |
| GW0012 | Boomer        | Germany        | 2005         | Hap2   |
| GW0013 | Borneo        | Germany        | 1997         | Hap2   |
| GW0015 | Bussard       | Germany        | 1990         | Hap2   |
| GW0019 | Cardos        | Germany        | 1998         | Hap2   |
| GW0146 | Folio         | France         | 1997         | Hap1   |
| GW0021 | Centrum       | Germany        | 2001         | Hap2   |
| GW0022 | Certo         | Germany        | 1999         | Hap2   |
| GW0136 | Charger       | France         | 1997         | Hap3   |
| GW0202 | Versailles    | France         | 1997         | Hap3   |
| GW0137 | Craklin       | France         | 1998         | Hap1   |
| GW0023 | Cetus         | Germany        | 2005         | Hap2   |
| GW0024 | Compliment    | Germany        | 2001         | Hap2   |
| GW0031 | Elvis         | Germany        | 2002         | Hap2   |
| GW0035 | Flair         | Germany        | 1996         | Hap2   |
| GW0036 | Format        | Germany        | 2007         | Hap2   |
| GW0038 | Haldor        | Germany        | 1999         | Hap2   |
| GW0041 | Impression    | Germany        | 2005         | Hap2   |
| GW0044 | Koch          | Germany        | 2003         | Hap2   |
| GW0048 | Limes         | Germany        | 2003         | Hap2   |
| GW0050 | Ludwig        | Germany        | 1998         | Hap2   |
| GW0173 | Ornicar       | France         | 1998         | Hap3   |
| GW0029 | Drifter       | Germany        | 1999         | Hap1   |
| GW0052 | Magnus        | Germany        | 2000         | Hap2   |
| GW0054 | Mandub        | Germany        | 2003         | Hap2   |
| GW0056 | Maverick      | Germany        | 1999         | Hap2   |
| GW0057 | Meteor        | Germany        | 2006         | Hap2   |
| GW0058 | Meunier       | Germany        | 1998         | Hap2   |
| GW0059 | Milvus        | Germany        | 2004         | Hap2   |
| GW0011 | Biscay        | Germany        | 2000         | Hap1   |
| GW0075 | Romanus       | Germany        | 2000         | Hap1   |
| GW0101 | History       | Germany        | 2000         | Hap1   |
| GW0119 | Autan         | France         | 2000         | Hap1   |
| GW0178 | Parador       | France         | 2000         | Hap1   |
| GW0060 | Mirage        | Germany        | 2006         | Hap2   |
| GW0064 | Naturastar    | Germany        | 2002         | Hap2   |

|        |           |                |      |      |
|--------|-----------|----------------|------|------|
| GW0065 | Olivin    | Germany        | 1999 | Hap2 |
| GW0068 | Petrus    | Germany        | 1996 | Hap2 |
| GW0069 | Piko      | Germany        | 1994 | Hap2 |
| GW0070 | Potenzial | Germany        | 2006 | Hap2 |
| GW0071 | Privileg  | Germany        | 2004 | Hap2 |
| GW0124 | Balance   | France         | 2000 | Hap3 |
| GW0131 | Caphorn   | France         | 2000 | Hap3 |
| GW0164 | Macro     | United Kingdom | 2000 | Hap3 |
| GW0239 | Symbol    | Denmark        | 2001 | Hap1 |
| GW0072 | Quebon    | Germany        | 2004 | Hap2 |
| GW0076 | Schamane  | Germany        | 2005 | Hap2 |
| GW0078 | Skalmeje  | Germany        | 2006 | Hap2 |
| GW0079 | Skater    | Germany        | 2000 | Hap2 |
| GW0081 | Sokrates  | Germany        | 2001 | Hap2 |
| GW0082 | Solitär   | Germany        | 2004 | Hap2 |
| GW0087 | Tommi     | Germany        | 2002 | Hap2 |
| GW0088 | Toras     | Germany        | 2004 | Hap2 |
| GW0027 | Dekan     | United Kingdom | 2001 | Hap3 |
| GW0106 | Andalou   | France         | 2001 | Hap3 |
| GW0118 | Aubusson  | France         | 2001 | Hap3 |
| GW0129 | Calisto   | France         | 2001 | Hap3 |
| GW0151 | Hamac     | France         | 2001 | Hap3 |
| GW0193 | Semafor   | France         | 2001 | Hap3 |
| GW0198 | Tapidor   | France         | 2001 | Hap3 |
| GW0055 | Manhattan | Germany        | 2002 | Hap1 |
| GW0084 | SW Topper | Germany        | 2002 | Hap1 |
| GW0113 | Allister  | France         | 2002 | Hap1 |
| GW0144 | Eveil     | France         | 2002 | Hap1 |
| GW0181 | PR22R20   | France         | 2002 | Hap1 |
| GW0089 | Toronto   | Germany        | 1990 | Hap2 |
| GW0090 | Transit   | Germany        | 1994 | Hap2 |
| GW0093 | Tulsa     | Germany        | 2004 | Hap2 |
| GW0099 | Dream     | Germany        | 1999 | Hap2 |
| GW0026 | Cubus     | Germany        | 2002 | Hap3 |
| GW0095 | Winnetou  | Germany        | 2002 | Hap3 |
| GW0126 | Bastide   | France         | 2002 | Hap3 |
| GW0133 | Catalan   | France         | 2002 | Hap3 |
| GW0142 | Equilibre | France         | 2002 | Hap3 |
| GW0165 | Marcheval | France         | 2002 | Hap3 |
| GW0184 | Quatuor   | France         | 2002 | Hap3 |
| GW0188 | Royssac   | France         | 2002 | Hap3 |
| GW0102 | Lindos    |                | 1994 | Hap2 |
| GW0116 | Astuce    | France         | 2004 | Hap2 |
| GW0125 | Baltimor  | France         | 1998 | Hap2 |
| GW0128 | Brando    | France         | 2000 | Hap2 |
| GW0134 | Cezanne   | France         | 1998 | Hap2 |
| GW0017 | Campari   | Germany        | 2003 | Hap3 |
| GW0018 | Capnor    | Germany        | 2003 | Hap3 |
| GW0066 | Opus      | Germany        | 2003 | Hap3 |
| GW0039 | Hermann   | Germany        | 2004 | Hap1 |
| GW0083 | Striker   | Germany        | 2004 | Hap1 |
| GW0094 | Türkis    | Germany        | 2004 | Hap1 |
| GW0100 | Florett   | Denmark        | 2004 | Hap1 |
| GW0105 | Exotic    | France         | 2004 | Hap1 |

|        |            |         |      |      |
|--------|------------|---------|------|------|
| GW0121 | Azimut     | France  | 2004 | Hap1 |
| GW0161 | Kleber     | France  | 2004 | Hap1 |
| GW0200 | Toisonдор  | France  | 2004 | Hap1 |
| GW0141 | Epidoc     | France  | 2006 | Hap2 |
| GW0147 | Forban     | France  | 2001 | Hap2 |
| GW0149 | Graindor   | France  | 2006 | Hap2 |
| GW0150 | Grisby     | France  | 2001 | Hap2 |
| GW0155 | Incisif    | France  | 2005 | Hap2 |
| GW0159 | Intense    | France  | 2001 | Hap2 |
| GW0160 | Isengrain  | France  | 1997 | Hap2 |
| GW0002 | Akratos    | Germany | 2004 | Hap3 |
| GW0040 | Heroldo    | Germany | 2004 | Hap3 |
| GW0080 | Sobi       | Germany | 2004 | Hap3 |
| GW0109 | Acienda    | France  | 2004 | Hap3 |
| GW0111 | Alcazar    | France  | 2004 | Hap3 |
| GW0156 | Inoui      | France  | 2004 | Hap3 |
| GW0167 | Mendel     | France  | 2004 | Hap3 |
| GW0187 | Rosario    | France  | 2004 | Hap3 |
| GW0006 | Anthus     | Germany | 2005 | Hap1 |
| GW0014 | Brilliant  | Germany | 2005 | Hap1 |
| GW0030 | Elegant    | Germany | 2005 | Hap1 |
| GW0047 | Leiffer    | Germany | 2005 | Hap1 |
| GW0051 | Magister   | Germany | 2005 | Hap1 |
| GW0145 | Exotic     | France  | 2005 | Hap1 |
| GW0158 | Intact     | France  | 2005 | Hap1 |
| GW0162 | Levis      | France  | 1998 | Hap2 |
| GW0169 | Nirvana    | France  | 2001 | Hap2 |
| GW0171 | Octet      | France  | 2007 | Hap2 |
| GW0172 | Ordeal     | France  | 1998 | Hap2 |
| GW0174 | Orpic      | France  | 1998 | Hap2 |
| GW0175 | Orvantis   | France  | 2000 | Hap2 |
| GW0091 | Tuareg     | Germany | 2005 | Hap3 |
| GW0110 | Aguila     | France  | 2005 | Hap3 |
| GW0115 | Arobase    | France  | 2005 | Hap3 |
| GW0132 | Caribou    | France  | 2005 | Hap3 |
| GW0166 | Maxyl      | France  | 2005 | Hap3 |
| GW0168 | Mercato    | France  | 2005 | Hap3 |
| GW0177 | Paledor    | France  | 2005 | Hap3 |
| GW0062 | Mulan      | Germany | 2006 | Hap1 |
| GW0077 | Skagen     | Germany | 2006 | Hap1 |
| GW0097 | Zobel      | Germany | 2006 | Hap1 |
| GW0122 | Azzuro     | France  | 2006 | Hap1 |
| GW0170 | Nuage      | France  | 2006 | Hap1 |
| GW0204 | Inédit     | France  | 2006 | Hap1 |
| GW0240 | Torkil     | Denmark | 2006 | Hap1 |
| GW0180 | PR 22 R 28 | France  | 2000 | Hap2 |
| GW0182 | Pulsar     | France  | 1998 | Hap2 |
| GW0183 | Pytagor    | France  | 2002 | Hap2 |
| GW0185 | Raison     | France  | 2006 | Hap2 |
| GW0194 | Seyrac     | France  | 2006 | Hap2 |
| GW0201 | Trocadero  | France  | 2001 | Hap2 |
| GW0207 | Expert     | France  | 2007 | Hap2 |
| GW0209 | H05581A    | France  |      | Hap2 |
| GW0049 | Lucius     | Germany | 2006 | Hap3 |

|        |                       |                |      |      |
|--------|-----------------------|----------------|------|------|
| GW0053 | Manager               | Germany        | 2006 | Hap3 |
| GW0092 | Tukan                 | Germany        | 2006 | Hap3 |
| GW0114 | Arack                 | France         | 2006 | Hap3 |
| GW0130 | Campero               | France         | 2006 | Hap3 |
| GW0148 | Garcia                | France         | 2006 | Hap3 |
| GW0152 | Hausmann              | France         | 2006 | Hap3 |
| GW0157 | Instinct              | France         | 2006 | Hap3 |
| GW0176 | Paladain              | France         | 2006 | Hap3 |
| GW0186 | Richepain             | France         | 2006 | Hap3 |
| GW0196 | Sogood                | France         | 2006 | Hap3 |
| GW0203 | CCB Ingénio           | France         | 2006 | Hap3 |
| GW0205 | CCB Préférence        | France         | 2006 | Hap3 |
| GW0033 | Esket                 | Germany        | 2007 | Hap1 |
| GW0073 | Retro                 | Germany        | 2007 | Hap1 |
| GW0224 | Iridium               | France         | 2007 | Hap1 |
| GW0210 | H04438                | France         |      | Hap2 |
| GW0221 | Altigo                | France         | 2007 | Hap2 |
| GW0223 | Boisseau              | France         | 2007 | Hap2 |
| GW0236 | Senat                 | Denmark        | 2000 | Hap2 |
| GW0237 | Smuggler              | Denmark        |      | Hap2 |
| GW0042 | Inspiration           | Germany        | 2007 | Hap3 |
| GW0043 | Jenga                 | Germany        | 2007 | Hap3 |
| GW0046 | Kranich               | Germany        | 2007 | Hap3 |
| GW0206 | Intérêt               | France         | 2007 | Hap3 |
| GW0208 | Bueno                 | France         | 2007 | Hap3 |
| GW0218 | Bermude               | France         | 2007 | Hap3 |
| GW0222 | Bagou                 | France         | 2007 | Hap3 |
| GW0103 | Julius                | Germany        | 2008 | Hap1 |
| GW0238 | Solist                | Denmark        | 2000 | Hap2 |
| GW0241 | Trintella             | Denmark        |      | Hap2 |
| GW0235 | Portland              | Denmark        |      | Hap1 |
| GW0252 | Globus                | Austria        | 2003 | Hap2 |
| GW0259 | Corsaire              | Czech Republic | 1999 | Hap2 |
| GW0098 | Cliff                 | Denmark        |      | Hap3 |
| GW0107 | LOCH 3754 LP 232.1.03 | Germany        |      | Hap3 |
| GW0225 | Andi                  |                |      | Hap3 |
| GW0242 | Tuscan                | Denmark        |      | Hap3 |

---

**Table S4. Primers used in this study.**

| Gene                                | 5'- sequence -3'                                                                                                                              | Vector               |
|-------------------------------------|-----------------------------------------------------------------------------------------------------------------------------------------------|----------------------|
| <b><i>Fine mapping</i></b>          |                                                                                                                                               |                      |
| Xhuj005                             | AAGAAGCTTGTCTCAGTTCCTG<br>GCGGCAAGGCGAAGGTAA                                                                                                  |                      |
| Xhuj006                             | AGGGTACTACTGCTGGCTCT<br>CCACAGCGTCACAATCAGAT                                                                                                  |                      |
| Xhuj007                             | GCTTACGGGAGGGAGTATGAG<br>AATCATACGACAACACCCGATG                                                                                               |                      |
| Xhuj008                             | ATGTCCATCAATTGCCTTGG<br>TGGCATCTCATGGTGACCTA                                                                                                  |                      |
| Xhuj009                             | AAGGAGCTGACGTACGTGGT<br>TGGTAGAGCCCGAATCTGTC                                                                                                  |                      |
| Xhuj010                             | CCCGATGGAGATGAATGAAC<br>GGGCAGATCCACATATCACC                                                                                                  |                      |
| Xhuj011                             | TCAGCCTCATGCTCAACATC<br>GTCCGGTCATCTCCACAGGTT                                                                                                 |                      |
| Xhuj012                             | GGAGCCCTCCATTTCGTCAAA<br>CGCGCCAGATATAAGCACCA                                                                                                 |                      |
| Xhuj013                             | CAGCAAATGACCCAATCAGA<br>GGTCCAAGACTGACTGTTGCT                                                                                                 |                      |
| Xhuj014                             | CCCAGAGACTTCCTTGCAAT<br>GGATTGGCGCTTCAAAGTAA                                                                                                  |                      |
| Xhuj015                             | CACTTCTGCTGGCAAGATCA<br>CCACATCATCTCCCTTAGGC                                                                                                  |                      |
| Xhuj016                             | GGGAACCTTGAGCTAGGGGAG<br>TGATCTCAAAACACCCACCC                                                                                                 |                      |
| <b><i>RNAi experiment</i></b>       |                                                                                                                                               |                      |
| <i>GNI-A1</i>                       | CACCTGGTTTTTCGCATGAATTAGC<br>CCAAAGATTAATAATCGCCGGA                                                                                           | pENTR D-TOPO         |
| Transgene                           | GCCGACGCGAAGCGGGTAGAT<br>CCAAAGATTAATAATCGCCGGA                                                                                               |                      |
| Transgene                           | GCGCGTTGGCGGTAACAAGAA<br>CCAAAGATTAATAATCGCCGGA                                                                                               |                      |
| Transgene                           | GTCTGCACCATCGTCAACC<br>GAAGTCCAGCTGCCAGAAAC                                                                                                   |                      |
| <b><i>qRT-PCR</i></b>               |                                                                                                                                               |                      |
| <i>GNI-A1</i>                       | ACAAAATAGGCGCTATAGCTGCTC<br>CGGGACAGATGATTTCTAGAGGTT                                                                                          |                      |
| <i>GNI-B1</i>                       | ACAAAATAGGTGCGTTAATTG<br>GGTATTTCTGATTCTGCAGC                                                                                                 |                      |
| <i>GNI-D1</i>                       | GCTATGCTATGGCTGCATGC<br>GATTTAGCGGCGGCCTTTTC                                                                                                  |                      |
| <i>Actin</i>                        | AAGTACAGTGTCTGGATTGGAGGG<br>TCGCAACTTAGAAGCACTTCCG                                                                                            |                      |
| <b><i>In situ hybridization</i></b> |                                                                                                                                               |                      |
| <i>GNI1</i>                         | TGGTTTTTCGCATGAATTAGC<br>CCAAAGATTAATAATCGCCAGA                                                                                               | pBluescript II KS(+) |
| <b><i>Resequencing</i></b>          |                                                                                                                                               |                      |
| <i>GNI-A1</i>                       | AGTCTCCAAAATTAAGTGGCAT<br>TGCCATTAATACACACTCTCCA                                                                                              |                      |
| <i>GNI-B1</i>                       | GTATTTGTCAAAAAAGAGAGTCGG<br>AGTTATATTAGAACAAGGGCAT                                                                                            |                      |
| <i>GNI-D1</i>                       | AGGAGCGCAAGCTGGAGACT<br>GATTTAGCGGCGGCCTTTTC                                                                                                  |                      |
| For sequencing                      | CCTGGCTCGGAAAGCACCTA<br>GGAGGGAGAGAGACCTAGGC<br>TCCAACCATCCCTTCTCTTCC<br>GGATGGTAACGGCTGGGAGA<br>AAGGAGAAGCTGAGAGCGAC<br>CCGATAGCAGCGTGTTCGAG |                      |

**Table S5.** List of Triticeae and outgroup species used in this study.

| Line      | Species                                                      | Subspecies / variety / cultivar                  | Genomes | Ploidy level (measured) | Country of origin  | Material source / Reference |
|-----------|--------------------------------------------------------------|--------------------------------------------------|---------|-------------------------|--------------------|-----------------------------|
| PI 222050 | <i>Psathyrostachys juncea</i> (Fisch.) Nevski                |                                                  | Ns      | 2×                      | Afghanistan        | USDA, Idaho, USA            |
| PI 565055 | <i>Psathyrostachys juncea</i> (Fisch.) Nevski                |                                                  | Ns      | 2×                      | Russian Federation | USDA, Idaho, USA            |
| PI 565077 | <i>Psathyrostachys juncea</i> (Fisch.) Nevski                |                                                  | Ns      | 2×                      | China              | USDA, Idaho, USA            |
| PI 565080 | <i>Psathyrostachys juncea</i> (Fisch.) Nevski                |                                                  | Ns      | 2×                      | Russian Federation | USDA, Idaho, USA            |
| PI 595135 | <i>Psathyrostachys juncea</i> (Fisch.) Nevski                |                                                  | Ns      | 2×                      | China              | USDA, Idaho, USA            |
| PI 598613 | <i>Psathyrostachys juncea</i> (Fisch.) Nevski                |                                                  | Ns      | 2×                      | Kazakhstan         | USDA, Idaho, USA            |
| PI 619487 | <i>Psathyrostachys juncea</i> (Fisch.) Nevski                |                                                  | Ns      | 2×                      | Mongolia           | USDA, Idaho, USA            |
| PI 632532 | <i>Pseudoroegneria spicata</i> (Pursh) A. Löve               |                                                  | St      | 2×                      | USA                | USDA, Idaho, USA            |
| PI 635993 | <i>Pseudoroegneria spicata</i> (Pursh) A. Löve               |                                                  | St      | 2×                      | USA                | USDA, Idaho, USA            |
| PI 325181 | <i>Pseudoroegneria stipifolia</i> (Czern. ex Nevski) A. Löve |                                                  | St      | 2×                      | Russian Federation | USDA, Idaho, USA            |
| PI 499638 | <i>Pseudoroegneria strigosa</i> (M. Bieb.) A. Löve           | ssp. <i>aegilopsides</i> (Drobow) A. Löve        | St      | 2×                      | China              | USDA, Idaho, USA            |
| W6 14049  | <i>Pseudoroegneria strigosa</i> (M. Bieb.) A. Löve           |                                                  | St      | 2×                      | Russian Federation | USDA, Idaho, USA            |
| PI 228389 | <i>Pseudoroegneria tauri</i> (Boiss. & Balansa) A. Löve      | ssp. <i>libanotica</i> (Hack.) A. Löve           | St      | 2×                      | Iran               | USDA, Idaho, USA            |
| PI 330688 | <i>Pseudoroegneria tauri</i> (Boiss. & Balansa) A. Löve      | ssp. <i>libanotica</i> (Hack.) A. Löve           | St      | 2×                      | Iran               | USDA, Idaho, USA            |
| PI 401274 | <i>Pseudoroegneria tauri</i> (Boiss. & Balansa) A. Löve      | ssp. <i>libanotica</i> (Hack.) A. Löve           | St      | 2×                      | Iran               | USDA, Idaho, USA            |
| PI 401322 | <i>Pseudoroegneria tauri</i> (Boiss. & Balansa) A. Löve      |                                                  | St      | 2×                      | Iran               | USDA, Idaho, USA            |
| PI 401333 | <i>Pseudoroegneria tauri</i> (Boiss. & Balansa) A. Löve      |                                                  | St      | 2×                      | Iran               | USDA, Idaho, USA            |
| H3140a    | <i>Hordeum vulgare</i>                                       | ssp. <i>spontaneum</i> (K. Koch) Asch. & Graebn. | H       | 2×                      | Cyprus             | NordGen, Alnarp, Sweden     |
| H3878     | <i>Hordeum bulbosum</i> L.                                   |                                                  | H       | 2×                      | Italy              | NordGen, Alnarp, Sweden     |
| BCC 2002  | <i>Hordeum murinum</i> L.                                    |                                                  | Xu      | 2×                      |                    |                             |
| H1012     | <i>Hordeum murinum</i> L.                                    | ssp. <i>leporinum</i> (Link) Arcangeli           | Xu      | 4×                      | –                  | NordGen, Alnarp, Sweden     |
| H2024     | <i>Hordeum pusillum</i> Nutt.                                |                                                  | I       | 2×                      | USA                | NordGen, Alnarp, Sweden     |
| H1941     | <i>Hordeum intercedens</i> Nevski                            |                                                  | I       | 2×                      | USA                | NordGen, Alnarp, Sweden     |
| H2148     | <i>Hordeum euclaston</i> Steud.                              |                                                  | I       | 2×                      | Uruguay            | NordGen, Alnarp, Sweden     |
| H2127     | <i>Hordeum flexuosum</i> Nees ex Steud.                      |                                                  | I       | 2×                      | Uruguay            | NordGen, Alnarp, Sweden     |
| H6479     | <i>Hordeum muticum</i> J.                                    |                                                  | I       | 2×                      | Argentina          | NordGen,                    |



|           |                                                                     |                                                               |    |    |                       |                                                    |
|-----------|---------------------------------------------------------------------|---------------------------------------------------------------|----|----|-----------------------|----------------------------------------------------|
|           | Presl                                                               |                                                               |    |    |                       | Alnarp,<br>Sweden                                  |
| H1816     | <i>Hordeum chilense</i><br>Brongn.                                  |                                                               | l  | 2× | Chile                 | NordGen,<br>Alnarp,<br>Sweden                      |
| H6460     | <i>Hordeum cordobense</i><br>Bothmer, N. Jacobsen<br>& Nicora       |                                                               | l  | 2× | Argentina             | NordGen,<br>Alnarp,<br>Sweden                      |
| H1780     | <i>Hordeum stenostachys</i><br>Godr.                                |                                                               | l  | 2× | Argentina             | NordGen,<br>Alnarp,<br>Sweden                      |
| H4014     | <i>Hordeum bogdanii</i><br>Wilensky                                 |                                                               | l  | 2× | Pakistan              | NordGen,<br>Alnarp,<br>Sweden                      |
| H10070    | <i>Hordeum roshevitzii</i><br>Bowden                                |                                                               | l  | 2× | Russia                | NordGen,<br>Alnarp,<br>Sweden                      |
| H10227    | <i>Hordeum<br/>brevisubulatum</i> (Trin.)<br>Link                   |                                                               | l  | 2× | Tajikistan            | NordGen,<br>Alnarp,<br>Sweden                      |
| H3317     | <i>Hordeum<br/>brachyantherum</i>                                   | ssp. californicum<br>(Covas & Stebbins)                       | l  | 2× | USA                   | NordGen,<br>Alnarp,<br>Sweden                      |
| H1150     | <i>Hordeum erectifolium</i><br>Bothmer, N. Jacobsen<br>& R.B. Jørg. |                                                               | l  | 2× | Argentina             | NordGen,<br>Alnarp,<br>Sweden                      |
| H1358     | <i>Hordeum patagonicum</i>                                          | ssp. mustersii<br>(Nicora) Bothmer,<br>Giles &<br>N. Jacobsen | l  | 2× | Argentina             | NordGen,<br>Alnarp,<br>Sweden                      |
| BCC 2028  | <i>Hordeum pubiflorum</i><br>Hook. f.                               | ssp. pubiflorum                                               | l  | 2× | Argentina             | International<br>Barley Core<br>Collection,<br>IPK |
| H121      | <i>Hordeum marinum</i><br>Huds.                                     |                                                               | Xa | 2× | Greece                | NordGen,<br>Alnarp,<br>Sweden                      |
| BCC 2006  | <i>Hordeum marinum</i><br>Huds.                                     | ssp. marinum                                                  | Xa | 2× | Spain                 | International<br>Barley Core<br>Collection,<br>IPK |
| GRA 2570  | <i>Taeniatherum<br/>caput-medusae</i> (L.)<br>Nevski                | ssp. crinitum<br>(Schreb.) Melderis                           | Ta | 2× | Kazakhstan            | IPK,<br>Gatersleben,<br>Germany                    |
| PI 220589 | <i>Taeniatherum<br/>caput-medusae</i> (L.)<br>Nevski                | ssp. crinitum<br>(Schreb.) Melderis                           | Ta | 2× | Afghanistan           | USDA,<br>Idaho, USA                                |
| PI 251387 | <i>Taeniatherum<br/>caput-medusae</i> (L.)<br>Nevski                | ssp. crinitum<br>(Schreb.) Melderis                           | Ta | 2× | Iran                  | USDA,<br>Idaho, USA                                |
| PI 561095 | <i>Taeniatherum<br/>caput-medusae</i> (L.)<br>Nevski                | ssp. crinitum<br>(Schreb.) Melderis                           | Ta | 2× | Turkey                | USDA,<br>Idaho, USA                                |
| GRA 1126  | <i>Taeniatherum<br/>caput-medusae</i> (L.)<br>Nevski                |                                                               | Ta | 2× | Tajikistan            | IPK,<br>Gatersleben,<br>Germany                    |
| PI 494615 | <i>Agropyron cristatum</i><br>(L.) Gaertn.                          |                                                               | P  | 2× | Romania               | USDA,<br>Idaho, USA                                |
| PI 598631 | <i>Agropyron cristatum</i><br>(L.) Gaertn.                          |                                                               | P  | 2× | Kazakhstan            | USDA,<br>Idaho, USA                                |
| GRA 2250  | <i>Eremopyrum triticeum</i><br>(Gaertn.) Nevski                     |                                                               | Ft | 2× | Kazakhstan            | IPK,<br>Gatersleben,<br>Germany                    |
| PI 502364 | <i>Eremopyrum triticeum</i><br>(Gaertn.) Nevski                     |                                                               | Ft | 2× | Russian<br>Federation | USDA,<br>Idaho, USA                                |
| W6 26631  | <i>Eremopyrum triticeum</i><br>(Gaertn.) Nevski                     |                                                               | Ft | 2× | Kazakhstan            | USDA,<br>Idaho, USA                                |
| GRA 1020  | <i>Dasyphyrum villosum</i><br>(L.) P. Candargy                      |                                                               | V  | 2× | Italy                 | IPK,<br>Gatersleben,                               |

|           |                                                        |                                              |    |    |             |                           |
|-----------|--------------------------------------------------------|----------------------------------------------|----|----|-------------|---------------------------|
|           |                                                        |                                              |    |    |             | Germany                   |
| GRA 1027  | <i>Dasypyrum villosum</i> (L.) P. Candargy             |                                              | V  | 2× | Bulgaria    | IPK, Gatersleben, Germany |
| PI 368884 | <i>Dasypyrum villosum</i> (L.) P. Candargy             |                                              | V  | 2× | Turkey      | USDA, Idaho, USA          |
| W6 19414  | <i>Dasypyrum villosum</i> (L.) P. Candargy             |                                              | V  | 2× | Bulgaria    | USDA, Idaho, USA          |
| W6 7300   | <i>Dasypyrum villosum</i> (L.) P. Candargy             |                                              | V  | 2× | Greece      | USDA, Idaho, USA          |
| PI 531553 | <i>Australopyrum retrofractum</i> (Vickery) A. Löve    |                                              | W  | 2× | Australia   | USDA, Idaho, USA          |
| PI 533013 | <i>Australopyrum retrofractum</i> (Vickery) A. Löve    |                                              | W  | 2× | Australia   | USDA, Idaho, USA          |
| PI 533014 | <i>Australopyrum retrofractum</i> (Vickery) A. Löve    |                                              | W  | 2× | Australia   | USDA, Idaho, USA          |
| PI 547363 | <i>Australopyrum retrofractum</i> (Vickery) A. Löve    |                                              | W  | 2× | Australia   | USDA, Idaho, USA          |
| PI 314152 | <i>Heterantherium piliferum</i> (Banks & Sol.) Hochst. |                                              | Q  | 2× | Uzbekistan  | USDA, Idaho, USA          |
| PI 401351 | <i>Heterantherium piliferum</i> (Banks & Sol.) Hochst. |                                              | Q  | 2× | Iran        | USDA, Idaho, USA          |
| PI 401353 | <i>Heterantherium piliferum</i> (Banks & Sol.) Hochst. |                                              | Q  | 2× | Iran        | USDA, Idaho, USA          |
| PI 401354 | <i>Heterantherium piliferum</i> (Banks & Sol.) Hochst. |                                              | Q  | 2× | Iran        | USDA, Idaho, USA          |
| PI 618662 | <i>Secale cereale</i> L.                               | ssp. <i>afghanicum</i> (Vavilov) K. Hammer   | R  | 2× | Armenia     | USDA, Idaho, USA          |
| PI 618665 | <i>Secale cereale</i> L.                               | ssp. <i>ancestrale</i> Zhuk.                 | R  | 2× |             | USDA, Idaho, USA          |
| PI 618669 | <i>Secale cereale</i> L.                               | ssp. <i>rigidum</i> Vavilov & Antropov       | R  | 2× | Turkey      | USDA, Idaho, USA          |
| PI 618671 | <i>Secale cereale</i> L.                               | ssp. <i>segetale</i> Zhuk.                   | R  | 2× | Turkey      | USDA, Idaho, USA          |
| PI 253957 | <i>Secale cereale</i> L.                               |                                              | R  | 2× | Afghanistan | USDA, Idaho, USA          |
| R 1027    | <i>Secale cereale</i> L.                               |                                              | R  | 2× | Italy       | IPK, Gatersleben, Germany |
| KU-S-4309 | <i>Secale cereale</i> L.                               | ssp. <i>afghanicum</i> (Vavilov) K. Hammer   | R  | 2× |             | Kyoto Univ., Kyoto, Japan |
| R 1108    | <i>Secale strictum</i> C. Presl                        | ssp. <i>kuprijanovii</i> (Grossh.) K. Hammer | R  | 2× | Kazakhstan  | IPK, Gatersleben, Germany |
| R 853     | <i>Secale strictum</i> C. Presl                        | ssp. <i>strictum</i> (Grossh.) K. Hammer     | R  | 2× | Italy       | IPK, Gatersleben, Germany |
| PI 203442 | <i>Eremopyrum bonaepartis</i> (Spreng.) Nevski         |                                              | Xe | 2× | Turkey      | USDA, Idaho, USA          |
| PI 222956 | <i>Eremopyrum bonaepartis</i> (Spreng.) Nevski         |                                              | Xe | 2× | Iran        | USDA, Idaho, USA          |
| PI 401347 | <i>Henrardia persica</i> (Boiss.) C.E. Hubb.           |                                              | O  | 2× | Iran        | USDA, Idaho, USA          |
| PI 577112 | <i>Henrardia persica</i> (Boiss.) C.E. Hubb.           |                                              | O  | 2× | Turkey      | USDA, Idaho, USA          |
| PI 577113 | <i>Henrardia persica</i>                               |                                              | O  | 2× | Turkey      | USDA,                     |

|           |                                                |                                                              |    |    |                      |                           |
|-----------|------------------------------------------------|--------------------------------------------------------------|----|----|----------------------|---------------------------|
|           | (Boiss.) C.E. Hubb.                            |                                                              |    |    |                      | Idaho, USA                |
| KU-6-1    | <i>Aegilops markgrafii</i> (Greuter) K. Hammer | <i>Aegilops caudata</i> ssp. <i>polyathera</i> Boiss.        | C  | 2× | –                    | Kyoto Univ., Kyoto, Japan |
| KU-6-2    | <i>Aegilops markgrafii</i> (Greuter) K. Hammer | <i>Aegilops caudata</i> ssp. <i>typica</i> L.                | C  | 2× | Syria                | Kyoto Univ., Kyoto, Japan |
| AE 1381   | <i>Aegilops markgrafii</i> (Greuter) K. Hammer |                                                              | C  | 2× | Greece               | IPK, Gatersleben, Germany |
| PI 254863 | <i>Aegilops markgrafii</i> (Greuter) K. Hammer |                                                              | C  | 2× | Iraq                 | USDA, Idaho, USA          |
| PI 542208 | <i>Aegilops markgrafii</i> (Greuter) K. Hammer |                                                              | C  | 2× | Turkey               | USDA, Idaho, USA          |
| PI 596287 | <i>Aegilops markgrafii</i> (Greuter) K. Hammer |                                                              | C  | 2× | Turkey               | USDA, Idaho, USA          |
| AE 1069   | <i>Aegilops tauschii</i> Coss.                 | ssp. <i>tauschii</i> var. <i>meyeri</i> (Griseb.) Tzvelev    | D  | 2× | Syrian Arab Republic | IPK, Gatersleben, Germany |
| 46800     | <i>Aegilops tauschii</i> Coss.                 |                                                              | D  | 2× | Turkey               | ICARDA, Aleppo, Syria     |
| 49116     | <i>Aegilops tauschii</i> Coss.                 |                                                              | D  | 2× | Iran                 | ICARDA, Aleppo, Syria     |
| AE 956    | <i>Aegilops tauschii</i> Coss.                 |                                                              | D  | 2× | Tajikistan           | IPK, Gatersleben, Germany |
| KU-20-10  | <i>Aegilops tauschii</i> Coss.                 |                                                              | D  | 2× | Iran                 | Kyoto Univ., Kyoto, Japan |
| AE 1255   | <i>Aegilops comosa</i> Sm.                     | ssp. <i>comosa</i> (Boiss.) Eig                              | M  | 2× | Greece               | IPK, Gatersleben, Germany |
| AE 1378   | <i>Aegilops comosa</i> Sm.                     | ssp. <i>comosa</i> var. <i>comosa</i>                        | M  | 2× | Greece               | IPK, Gatersleben, Germany |
| AE 783    | <i>Aegilops comosa</i> Sm.                     | ssp. <i>heldreichii</i> (Boiss.) Eig                         | M  | 2× | Greece               | IPK, Gatersleben, Germany |
| PI 276970 | <i>Aegilops comosa</i> Sm.                     | var. <i>comosa</i>                                           | M  | 2× | Greece               | USDA, Idaho, USA          |
| AE 157    | <i>Aegilops uniaristata</i> Vis.               |                                                              | N  | 2× | Former Soviet Union  | IPK, Gatersleben, Germany |
| AE 680    | <i>Aegilops uniaristata</i> Vis.               |                                                              | N  | 2× | Italy                | IPK, Gatersleben, Germany |
| PI 276996 | <i>Aegilops uniaristata</i> Vis.               |                                                              | N  | 2× | Turkey               | USDA, Idaho, USA          |
| PI 487231 | <i>Aegilops speltoides</i> Tausch              | ssp. <i>ligustica</i> (Savign.) Zhuk.                        | S  | 2× | Syrian Arab Republic | USDA, Idaho, USA          |
| PI 486264 | <i>Aegilops speltoides</i> Tausch              | ssp. <i>ligustica</i> var. <i>ligustica</i> (Savign.) Bornm. | S  | 2× | Turkey               | USDA, Idaho, USA          |
| AE 1064   | <i>Aegilops speltoides</i> Tausch              | ssp. <i>speltoides</i> (Savign.) Bornm.                      | S  | 2× | Syrian Arab Republic | IPK, Gatersleben, Germany |
| AE 900    | <i>Aegilops speltoides</i> Tausch              | ssp. <i>speltoides</i> (Savign.) Bornm.                      | S  | 2× | Iraq                 | IPK, Gatersleben, Germany |
| PI 542245 | <i>Aegilops speltoides</i> Tausch              | var. <i>speltoides</i>                                       | S  | 2× | Turkey               | USDA, Idaho, USA          |
| KU-7856   | <i>Aegilops speltoides</i> Tausch              |                                                              | S  | 2× | Iraq                 | Kyoto Univ., Kyoto, Japan |
| AE 106    | <i>Aegilops bicornis</i> Jaub. & Spach         | var. <i>bicornis</i>                                         | Sb | 2× | Russian Federation   | IPK, Gatersleben, Germany |
| AE 1079   | <i>Aegilops bicornis</i> Jaub. & Spach         | var. <i>mutica</i> (Asch.) Eig                               | Sb | 2× | Jordan               | IPK, Gatersleben, Germany |
| AE 788    | <i>Aegilops bicornis</i> Jaub. & Spach         |                                                              | Sb | 2× | Libya                | IPK, Gatersleben,         |

|            |                                                       |                                                           |    |    |                      |                                                              |
|------------|-------------------------------------------------------|-----------------------------------------------------------|----|----|----------------------|--------------------------------------------------------------|
|            |                                                       |                                                           |    |    |                      | Germany                                                      |
| KU-5786    | <i>Aegilops bicornis</i> Jaub. & Spach                |                                                           | Sb | 2× | Egypt                | Kyoto Univ.,<br>Kyoto, Japan                                 |
| AE 1078    | <i>Aegilops longissima</i> Schweinf. & Muschl.        | ssp. <i>longissima</i> (Eig) K. Hammer                    | Sl | 2× | Jordan               | IPK,<br>Gatersleben,<br>Germany                              |
| AE 417     | <i>Aegilops longissima</i> Schweinf. & Muschl.        | ssp. <i>longissima</i> (Eig) K. Hammer                    | Sl | 2× | Israel               | IPK,<br>Gatersleben,<br>Germany                              |
| AE 906     | <i>Aegilops longissima</i> Schweinf. & Muschl.        | ssp. <i>longissima</i> (Eig) K. Hammer                    | Sl | 2× | Israel               | IPK,<br>Gatersleben,<br>Germany                              |
| AE 133     | <i>Aegilops longissima</i> Schweinf. & Muschl.        | ssp. <i>sharonensis</i> var. <i>major</i> (Eig) K. Hammer | Sl | 2× |                      | IPK,<br>Gatersleben,<br>Germany                              |
| PI 604141  | <i>Aegilops longissima</i> Schweinf. & Muschl.        |                                                           | Sl | 2× | Israel               | USDA,<br>Idaho, USA                                          |
| TA 1921    | <i>Aegilops longissima</i> Schweinf. & Muschl.        |                                                           | Sl | 2× | Jordan               | Kansas State Univ.,<br>Kansas, USA                           |
| KU-4-1     | <i>Aegilops longissima</i> Schweinf. et Muschl.       |                                                           | Sl | 2× | Israel               | Kyoto Univ.,<br>Kyoto, Japan                                 |
| KU-5-2     | <i>Aegilops sharonensis</i> Eig                       |                                                           | Sl | 2× | Israel               | Kyoto Univ.,<br>Kyoto, Japan                                 |
| AE 1075    | <i>Aegilops searsii</i> Feldman & Kislev ex K. Hammer |                                                           | Ss | 2× | Jordan               | IPK,<br>Gatersleben,<br>Germany                              |
| AE 1083    | <i>Aegilops searsii</i> Feldman & Kislev ex K. Hammer |                                                           | Ss | 2× | Syrian Arab Republic | IPK,<br>Gatersleben,<br>Germany                              |
| KU-14655   | <i>Aegilops searsii</i> Feldman & Kislev ex K. Hammer |                                                           | Ss | 2× | Israel               | Kyoto Univ.,<br>Kyoto, Japan                                 |
| PI 599142  | <i>Aegilops searsii</i> Feldman & Kislev ex K. Hammer |                                                           | Ss | 2× | Jordan               | USDA,<br>Idaho, USA                                          |
| PI 599148  | <i>Aegilops searsii</i> Feldman & Kislev ex K. Hammer |                                                           | Ss | 2× | Syrian Arab Republic | USDA,<br>Idaho, USA                                          |
| 01C2100106 | <i>Amblyopyrum muticum</i> (Boiss.) Eig.              | var. <i>loliacea</i> (Jaub. & Sp.) Eig                    | T  | 2× | Turkey               | Genebank Res. Inst. Crop Prod.,<br>Prague,<br>Czech Republic |
| PI 560122  | <i>Amblyopyrum muticum</i> (Boiss.) Eig.              |                                                           | T  | 2× | Turkey               | USDA,<br>Idaho, USA                                          |
| PI 560124  | <i>Amblyopyrum muticum</i> (Boiss.) Eig.              |                                                           | T  | 2× | Turkey               | USDA,<br>Idaho, USA                                          |
| PI 560125  | <i>Amblyopyrum muticum</i> (Boiss.) Eig.              |                                                           | T  | 2× | Turkey               | USDA,<br>Idaho, USA                                          |
| PI 560126  | <i>Amblyopyrum muticum</i> (Boiss.) Eig.              |                                                           | T  | 2× | Turkey               | USDA,<br>Idaho, USA                                          |
| PI 636562  | <i>Amblyopyrum muticum</i> (Boiss.) Eig.              |                                                           | T  | 2× | Turkey               | USDA,<br>Idaho, USA                                          |
| AE 153     | <i>Aegilops umbellulata</i> Zhuk.                     | ssp. <i>umbellulata</i> var. <i>umbellulata</i>           | U  | 2× | Iran                 | IPK,<br>Gatersleben,<br>Germany                              |
| AE 740     | <i>Aegilops umbellulata</i> Zhuk.                     |                                                           | U  | 2× | Turkey               | IPK,<br>Gatersleben,<br>Germany                              |
| AE 811     | <i>Aegilops umbellulata</i> Zhuk.                     |                                                           | U  | 2× | Azerbaijan           | IPK,<br>Gatersleben,<br>Germany                              |
| KU-8-1     | <i>Aegilops umbellulata</i> Zhuk.                     |                                                           | U  | 2× | Turkey               | Kyoto Univ.,<br>Kyoto, Japan                                 |
| BGRC 20518 | <i>Triticum monococcum</i> L.                         | ssp. <i>aegilopoides</i> (Link) Thell.                    | A  | 2× | Balkans              | IPK,<br>Gatersleben,<br>Germany                              |

|            |                                               |                                                              |    |    |                      |                                 |
|------------|-----------------------------------------------|--------------------------------------------------------------|----|----|----------------------|---------------------------------|
| ID 379     | <i>Triticum monococcum</i> L.                 | ssp. <i>aegilopoides</i> (Link) Thell.                       | A  | 2× | Lebanon              | Kansas State Univ., Kansas, USA |
| PI 272520  | <i>Triticum monococcum</i> L.                 | ssp. <i>aegilopoides</i> (Link) Thell.                       | A  | 2× | Hungary              | USDA, Idaho, USA                |
| PI 427451  | <i>Triticum monococcum</i> L.                 | ssp. <i>aegilopoides</i> (Link) Thell.                       | A  | 2× | Turkey               | USDA, Idaho, USA                |
| PI 427620  | <i>Triticum monococcum</i> L.                 | ssp. <i>aegilopoides</i> (Link) Thell.                       | A  | 2× | Turkey               | USDA, Idaho, USA                |
| PI 427627  | <i>Triticum monococcum</i> L.                 | ssp. <i>aegilopoides</i> (Link) Thell.                       | A  | 2× | Turkey               | USDA, Idaho, USA                |
| KU-101-1   | <i>Triticum monococcum</i> L.                 | ssp. <i>aegilopoides</i> (Link) Thell.                       | A  | 2× | –                    | Kyoto Univ., Kyoto, Japan       |
| BGRC 43454 | <i>Triticum monococcum</i> L.                 |                                                              | A  | 2× | Germany              | IPK, Gatersleben, Germany       |
| BGRC 43459 | <i>Triticum monococcum</i> L.                 |                                                              | A  | 2× | Switzerland          | IPK, Gatersleben, Germany       |
| PI 119423  | <i>Triticum monococcum</i> L.                 |                                                              | A  | 2× |                      | USDA, Idaho, USA                |
| TRI 13061  | <i>Triticum monococcum</i> L.                 |                                                              | A  | 2× | Italy                | IPK, Gatersleben, Germany       |
| TRI 13612  | <i>Triticum monococcum</i> L.                 |                                                              | A  | 2× | Georgia              | IPK, Gatersleben, Germany       |
| KU-104-2   | <i>Triticum monococcum</i> L.                 |                                                              | A  | 2× | –                    | Kyoto Univ., Kyoto, Japan       |
| KU-104-5   | <i>Triticum monococcum</i> L.                 |                                                              | A  | 2× | –                    | Kyoto Univ., Kyoto, Japan       |
| TRI 17824  | <i>Triticum urartu</i> Thumanjan ex Gandilyan | var. <i>spontaneoalbum</i> Tumanian ex Dorof. & Filat.       | A  | 2× | Lebanon              | IPK, Gatersleben, Germany       |
| TRI 18407  | <i>Triticum urartu</i> Thumanjan ex Gandilyan | var. <i>spontaneoalbum</i> Tumanian ex Dorof. & Filat.       | A  | 2× | Syrian Arab Republic | IPK, Gatersleben, Germany       |
| PI 428184  | <i>Triticum urartu</i> Thumanjan ex Gandilyan |                                                              | A  | 2× | Turkey               | USDA, Idaho, USA                |
| PI 428317  | <i>Triticum urartu</i> Thumanjan ex Gandilyan |                                                              | A  | 2× | Iran                 | USDA, Idaho, USA                |
| PI 428320  | <i>Triticum urartu</i> Thumanjan ex Gandilyan |                                                              | A  | 2× | Lebanon              | USDA, Idaho, USA                |
| KU-199-12  | <i>Triticum urartu</i> Thumanjan ex Gandilyan |                                                              | A  | 2× | Turkey               | Kyoto Univ., Kyoto, Japan       |
| TRI 15127  | <i>Triticum turgidum</i> L.                   | ssp. <i>carthlicum</i> (Nevski) A. Löve & D. Löve            | BA | 4× | Georgia              | IPK, Gatersleben, Germany       |
| KU-8812    | <i>Triticum turgidum</i> L.                   | ssp. <i>dicoccoides</i> (Koern. ex Aschers. & Graebn.) Thell | BA | 4× | Iraque               | Kyoto Univ., Kyoto, Japan       |
| PI 352322  | <i>Triticum turgidum</i> L.                   | ssp. <i>dicoccoides</i> (Koern. ex Aschers. & Graebn.) Thell | BA | 4× | Lebanon              | USDA, Idaho, USA                |
| PI 41025   | <i>Triticum turgidum</i> L.                   | ssp. <i>dicoccoides</i> (Koern. ex Aschers. & Graebn.) Thell | BA | 4× | Russian Federation   | USDA, Idaho, USA                |
| PI 428018  | <i>Triticum turgidum</i> L.                   | ssp. <i>dicoccoides</i> (Koern. ex Aschers. & Graebn.) Thell | BA | 4× | Turkey               | USDA, Idaho, USA                |

|                 |                                               |                                                              |     |    |                      |                                                        |
|-----------------|-----------------------------------------------|--------------------------------------------------------------|-----|----|----------------------|--------------------------------------------------------|
| PI 428093       | <i>Triticum turgidum</i> L.                   | ssp. <i>dicoccoides</i> (Koern. ex Aschers. & Graebn.) Thell | BA  | 4× | Israel               | USDA, Idaho, USA                                       |
| TRI 3428        | <i>Triticum turgidum</i> L.                   | ssp. <i>polonicum</i> (L.) Thell.                            | BA  | 4× | Turkey               | IPK, Gatersleben, Germany                              |
| TRI 6243        | <i>Triticum turgidum</i> L.                   |                                                              | BA  | 4× | Iran                 | IPK, Gatersleben, Germany                              |
| 01C0202037      | <i>Triticum timopheevii</i> (Zhuk.) Zhuk.     |                                                              | GA  | 4× | SUN                  | Genebank Res. Inst. Crop Prod., Prague, Czech Republic |
| IG 119456       | <i>Triticum timopheevii</i> (Zhuk.) Zhuk.     |                                                              | GA  | 4× | Syrian Arab Republic | ICARDA, Aleppo, Syria                                  |
| KU-1820         | <i>Triticum timopheevii</i> (Zhuk.) Zhuk.     |                                                              | GA  | 4× | Former Soviet Union  | Kyoto Univ., Kyoto, Japan                              |
| KU-1966         | <i>Triticum timopheevii</i> (Zhuk.) Zhuk.     |                                                              | GA  | 4× | Turkey               | Kyoto Univ., Kyoto, Japan                              |
| KU-8561         | <i>Triticum timopheevii</i> (Zhuk.) Zhuk.     |                                                              | GA  | 4× |                      | Kyoto Univ., Kyoto, Japan                              |
| KU-8939         | <i>Triticum timopheevii</i> (Zhuk.) Zhuk.     |                                                              | GA  | 4× | Turkey               | Kyoto Univ., Kyoto, Japan                              |
| PI 352264       | <i>Triticum timopheevii</i> (Zhuk.) Zhuk.     |                                                              | GA  | 4× | Armenia              | USDA, Idaho, USA                                       |
| TRI 7258        | <i>Triticum zhukovskyi</i> Menabde & Ericzjan |                                                              | GAA | 6× | Georgia              | IPK, Gatersleben, Germany                              |
| 01C0204240      | <i>Triticum kiharae</i> Dorof. & Migush.      |                                                              | GAD | 6× |                      | Genebank Res. Inst. Crop Prod., Prague, Czech Republic |
| BK 2011         | <i>Triticum aestivum</i> L.                   | cv. Chinese Spring                                           | BAD | 6× |                      | Dr. Benjamin Kilian, IPK                               |
| PI 83402        | <i>Triticum aestivum</i> L.                   | ssp. <i>sphaerococcum</i> (Percival) Mac Key                 | BAD | 6× | China                | USDA, Idaho, USA                                       |
| <b>Outgroup</b> |                                               |                                                              |     |    |                      |                                                        |
| AH_2011         | <i>Brachypodium pinnatum</i> (L.) P. Beauv.   |                                                              |     | 4× |                      | Prof. Andreas Houben, IPK                              |
| W6 21403        | <i>Bromus inermis</i> Leyss.                  |                                                              |     | 4× | Mongolia             | USDA, Idaho, USA                                       |
| GRA 1085        | <i>Bromus tectorum</i> L.                     |                                                              |     | 4× | Libya                | IPK, Gatersleben, Germany                              |

## References

1. Joppa LR (1993) Chromosome engineering in tetraploid wheat. *Crop Science* 33(5):908-913.
2. Golan G, Oksenberg A, & Peleg Z (2015) Genetic evidence for differential selection of grain and embryo weight during wheat evolution under domestication. *J Exp Bot* 66(19):5703-5711.
3. Avni R, *et al.* (2017) Wild emmer genome architecture and diversity elucidate wheat evolution and domestication. *Science* 357(6346):93-97.
4. Miki D & Shimamoto K (2004) Simple RNAi vectors for stable and transient suppression of gene function in rice. *Plant Cell Physiol* 45(4):490-495.
5. Pellegrineschi A, *et al.* (2002) Identification of highly transformable wheat genotypes for mass production of fertile transgenic plants. *Genome* 45(2):421-430.
6. Kirby EJM & Appleyard M (1981) *Cereal development guide* (Cereal Unit, Kenilworth) 1st Ed p 80.
7. Komatsuda T, *et al.* (2007) Six-rowed barley originated from a mutation in a homeodomain-leucine zipper I-class homeobox gene. *Proceedings of the National Academy of Sciences* 104(4):1424-1429.
8. International Wheat Genome Sequencing C, *et al.* (2018) Shifting the limits in wheat research and breeding using a fully annotated reference genome. *Science* 361(6403).
9. Bray NL, Pimentel H, Melsted P, & Pachter L (2016) Near-optimal probabilistic RNA-seq quantification. *Nat Biotechnol* 34(5):525-527.
10. R Core Team (2015) R: A Language and Environment for Statistical Computing (R Foundation for Statistical Computing).
11. Law CW, Chen Y, Shi W, & Smyth GK (2014) voom: Precision weights unlock linear model analysis tools for RNA-seq read counts. *Genome biology* 15(2):R29.
12. Smyth GK (2005) Limma: linear models for microarray data. *Bioinformatics and computational biology solutions using R and Bioconductor*, (Springer), pp 397-420.
13. Alexa A & Rahnenfuhrer J (2010) topGO: enrichment analysis for gene ontology. *R package version 2(0)*.
14. Ramirez-Gonzalez RH, *et al.* (2018) The transcriptional landscape of polyploid wheat. *Science* 361(6403).
15. Borrill P, Ramirez-Gonzalez R, & Uauy C (2016) expVIP: a Customizable RNA-seq Data Analysis and Visualization Platform. *Plant Physiol* 170(4):2172-2186.
16. Kumar S, Stecher G, & Tamura K (2016) MEGA7: Molecular Evolutionary Genetics Analysis Version 7.0 for Bigger Datasets. *Mol Biol Evol* 33(7):1870-1874.
17. Bandelt HJ, Forster P, & Rohlf A (1999) Median-joining networks for inferring intraspecific phylogenies. *Mol Biol Evol* 16(1):37-48.
18. Guo Z, *et al.* (2017) Genome-wide association analyses of 54 traits identified multiple loci for the determination of floret fertility in wheat. *New Phytol* 214(1):257-270.

19. Bernhardt N, Brassac J, Kilian B, & Blattner FR (2017) Dated tribe-wide whole chloroplast genome phylogeny indicates recurrent hybridizations within Triticeae. *BMC Evol Biol* 17(1):141.
20. Kearse M, *et al.* (2012) Geneious Basic: an integrated and extendable desktop software platform for the organization and analysis of sequence data. *Bioinformatics* 28(12):1647-1649.
21. Brassac J & Blattner FR (2015) Species-Level Phylogeny and Polyploid Relationships in Hordeum (Poaceae) Inferred by Next-Generation Sequencing and In Silico Cloning of Multiple Nuclear Loci. *Systematic biology* 64(5):792-808.
22. Katoh K & Standley DM (2013) MAFFT multiple sequence alignment software version 7: improvements in performance and usability. *Mol Biol Evol* 30(4):772-780.
23. Darriba D, Taboada GL, Doallo R, & Posada D (2012) jModelTest 2: more models, new heuristics and parallel computing. *Nat Methods* 9(8):772.
24. Schwarz G (1978) Estimating the Dimension of a Model. *Ann. Statist.* 6(2):461-464.
25. Ronquist F & Huelsenbeck JP (2003) MrBayes 3: Bayesian phylogenetic inference under mixed models. *Bioinformatics* 19(12):1572-1574.
26. Escobar JS, *et al.* (2011) Multigenic phylogeny and analysis of tree incongruences in Triticeae (Poaceae). *BMC Evol Biol* 11:181.
27. Mason-Gamer RJ (2013) Phylogeny of a genomically diverse group of *Elymus* (Poaceae) allopolyploids reveals multiple levels of reticulation. *PLoS One* 8(11):e78449.
